# Supplementary material for: A complete time-calibrated multi-gene phylogeny of the European butterflies
Source: Zookeys. 2020 Jun 4;938:97–124. doi: 10.3897/zookeys.938.50878 (PMC7289901; doi:10.3897/zookeys.938.50878)
Supplement: Supplementary material 1 — Table listing of European butterfly species with higher taxonomy, voucher codes and accession numbers for the sequences used to build the phylogeny. [file zookeys-938-097-s001.xlsx]

## Sheet: S1
Species name	Full name	Family	Subfamily	Genus	Species	ID	Voucher	Dataset	COI-barcode	COI-3'	nuclear	voucher_identical	ArgKin	CAD	DDC	EF-1a	GAPDH	H3	IDH	MDH	RpS2	RpS5	wingless	Remarks
Aglais ichnusa	Aglais ichnusa (Hübner, 1824)	Nymphalidae	Nymphalinae	Aglais	ichnusa	WMB1577-13	RV12O525	Nymphalinae	MH419480		FALSE	#N/A
Aglais io	Aglais io (Linnaeus, 1758)	Nymphalidae	Nymphalinae	Aglais	io	NW63-16	NW63-16	Nymphalinae	AY248785	AY248785	TRUE	TRUE	MN752826	MN752809	MN752818	AY248810	FJ639521			MN752745		FJ639576	AF412766
Aglais urticae	Aglais urticae (Linnaeus, 1758)	Nymphalidae	Nymphalinae	Aglais	urticae	NW63-3	NW63-3	Nymphalinae	AY248786	AY248786	TRUE	TRUE	GQ864509	GQ864599	MN752820	AY248811	FJ639522		GQ865055	GQ865161	GQ865282	FJ639577	AF412777
Agriades aquilo	Agriades aquilo (Boisduval, 1832)	Lycaenidae	Polyommatinae	Agriades	aquilo	NHMO-06179	NHMO-06179	Lycaenidae	KX049851		FALSE	#N/A
Agriades dardanus	Agriades dardanus (Freyer, 1843)	Lycaenidae	Polyommatinae	Agriades	dardanus	AD00P259	AD00P259	Lycaenidae	GQ128944	GQ128944	TRUE	TRUE		GQ128558		GQ128633		GQ128732					GQ128840
Agriades glandon	Agriades glandon (Prunner, 1798)	Lycaenidae	Polyommatinae	Agriades	glandon	VL05Z994	VL05Z994	Lycaenidae	GQ128942	GQ128942	TRUE	FALSE				EU326285		GQ128729
Agriades optilete	Agriades optilete (Knoch, 1781)	Lycaenidae	Polyommatinae	Agriades	optilete	VL01B424	VL01B424	Lycaenidae	GQ129011	GQ129011	TRUE	TRUE		GQ128630		GQ128699		GQ128803					GQ128910
Agriades orbitulus	Agriades orbitulus (Prunner, 1798)	Lycaenidae	Polyommatinae	Agriades	orbitulus	AD03B064	AD03B064	Lycaenidae	GQ128945	GQ128945	TRUE	TRUE		GQ128560		GQ128634		GQ128734					GQ128842
Agriades pyrenaicus	Agriades pyrenaicus (Boisduval, 1840)	Lycaenidae	Polyommatinae	Agriades	pyrenaicus	MW99018	MW99018	Lycaenidae	AY557030		FALSE	#N/A
Agriades zullichi	Agriades zullichi Hemming, 1933	Lycaenidae	Polyommatinae	Agriades	zullichi	RVcoll.09-V415	RV09V415	Lycaenidae	HM901731		FALSE	#N/A
Anthocharis cardamines	Anthocharis cardamines (Linnaeus, 1758)	Pieridae	Pierinae	Anthocharis	cardamines	NW151-2	NW151-2	Pieridae	KM046799	KM046799	TRUE	FALSE		KM046912		JX495351	KM046841		KM046735	KM046672		KM046601	KM046563
Anthocharis damone	Anthocharis damone Boisduval, 1836	Pieridae	Pierinae	Anthocharis	damone	WMB1125-13	WMB1125-13	Pieridae	MN139212		FALSE	#N/A
Anthocharis euphenoides	Anthocharis euphenoides Staudinger, 1869	Pieridae	Pierinae	Anthocharis	euphenoides	NW151-1	NW151-1	Pieridae	KM046798	KM046798	TRUE	FALSE		KM046494		AY870560	KM046840		KM046734	KM046671		KM046600	AY954604
Anthocharis gruneri	Anthocharis gruneri Herrich-Schäffer, 1851	Pieridae	Pierinae	Anthocharis	gruneri	NMNHL030-10	BC_SB_Lep_0030	Pieridae	HM888370		FALSE	#N/A
Apatura ilia	Apatura ilia ([Denis & Schiffermüller], 1775)	Nymphalidae	Apaturinae	Apatura	ilia	NCBI04	BC_ZSM_Lep_30727	Apaturinae	HM393229		TRUE	FALSE				JX185969
Apatura iris	Apatura iris (Linnaeus, 1758)	Nymphalidae	Apaturinae	Apatura	iris	NW69-6	NW69-6	Apaturinae	AY090199	AY090199	TRUE	TRUE	EU141280	EU141335		AY090165	EU141513		EU141572	EU141636	EU141692	EU141413	AY090132
Apatura metis	Apatura metis Freyer, 1829	Nymphalidae	Apaturinae	Apatura	metis	NW100-1	NW100-1	Apaturinae	MN752702	MN752702	TRUE	FALSE				GU372611							MN752840
Aphantopus hyperantus	Aphantopus hyperantus (Linnaeus, 1758)	Nymphalidae	Satyrinae	Aphantopus	hyperantus	EW2-1	EW2-1	Satyrinae2	AY090211	AY090211	TRUE	TRUE				AY090177	GQ357458					GQ357588	KR139111
Aporia crataegi	Aporia crataegi (Linnaeus, 1758)	Pieridae	Pierinae	Aporia	crataegi	NW149-4	NW149-4	Pieridae	EU141361	EU141361	TRUE	TRUE		EU141316		EU136668	EU141496		EU141553	EU141618	EU141679	EU141394	EU141242
Araschnia levana	Araschnia levana (Linnaeus, 1758)	Nymphalidae	Nymphalinae	Araschnia	levana	NW138-12	NW138-12	Nymphalinae	GQ864735	GQ864735	TRUE	TRUE	GQ864516	GQ864610	MN752817	GQ864829	GQ864925		GQ865064	GQ865171		GQ865391	GQ864423
Archon apollinus	Archon apollinus (Herbst, 1798)	Papilionidae	Parnassiinae	Archon	apollinus	FS-b-1868	FS-b-1868	Papilionidae	DQ351031	DQ351031	TRUE	TRUE				DQ351111							DQ351135
Arethusana arethusa	Arethusana arethusa ([Denis & Schiffermüller], 1775)	Nymphalidae	Satyrinae	Arethusana	arethusa	CP11-06	CP11-06	Satyrinae2	DQ338863	DQ338863	TRUE	TRUE				DQ339018	GQ357500					GQ357626	DQ338728
Argynnis laodice	Argynnis laodice (Pallas, 1771)	Nymphalidae	Heliconiinae	Argynnis	laodice	NW104-15	NW104-15	Heliconiinae_Limenitidinae	DQ922844	DQ922844	TRUE	TRUE				DQ922876	KY773381					KY773485	DQ922812
Argynnis pandora	Argynnis pandora ([Denis & Schiffermüller], 1775)	Nymphalidae	Heliconiinae	Argynnis	pandora	NW105-1	NW105-1	Heliconiinae_Limenitidinae	DQ922862	DQ922862	TRUE	TRUE				DQ922894	KY773382					KY773486	DQ922830
Argynnis paphia	Argynnis paphia (Linnaeus, 1758)	Nymphalidae	Heliconiinae	Argynnis	paphia	NW76-12	NW76-12	Heliconiinae_Limenitidinae	AY090200	AY090200	TRUE	TRUE	MG741843	EU141343	MG741745	AY090166	EU141519		EU141580	EU141644	EU141699	EU141421	AY090133
Aricia agestis	Aricia agestis ([Denis & Schiffermüller], 1775)	Lycaenidae	Polyommatinae	Aricia	agestis	NK00P712	NK00P712	Lycaenidae	AY496801	AY496801	TRUE	TRUE		GQ128561		AY496824		GQ128735					GQ128843
Aricia anteros	Aricia anteros (Freyer, 1838)	Lycaenidae	Polyommatinae	Aricia	anteros	ILL_137	ILL_137	Lycaenidae	KF647244		TRUE	FALSE				KJ671880		JX093317					JX093414
Aricia artaxerxes	Aricia artaxerxes (Fabricius, 1793)	Lycaenidae	Polyommatinae	Aricia	artaxerxes	AD02W127	AD02W127	Lycaenidae	JX093482	JX093482	TRUE	TRUE		JX093255		JX093308		JX093318					JX093415
Aricia cramera	Aricia cramera (Eschscholtz, 1821)	Lycaenidae	Polyommatinae	Aricia	cramera	RVLD415	RVLD415	Lycaenidae	JX678036		FALSE	#N/A
Aricia montensis	Aricia montensis Verity, 1928	Lycaenidae	Polyommatinae	Aricia	montensis	RV08R208	RV08R208	Lycaenidae	JX678069		FALSE	#N/A
Aricia morronensis	Aricia morronensis (Ribbe, 1910)	Lycaenidae	Polyommatinae	Aricia	morronensis	RV08J988	RV08J988	Lycaenidae	JX678018		FALSE	#N/A
Aricia nicias	Aricia nicias (Meigen, 1829)	Lycaenidae	Polyommatinae	Aricia	nicias	AD03B041	AD03B041	Lycaenidae	GQ128992	GQ128992	TRUE	TRUE		GQ128612		GQ128681		GQ128785					GQ128892
Azanus jesous	Azanus jesous (Guérin-Méneville, 1849)	Lycaenidae	Polyommatinae	Azanus	jesous	RV07D788	RV07D788	Lycaenidae	KP871115		TRUE	FALSE				KP053285
Azanus ubaldus	Azanus ubaldus (Stoll, 1782)	Lycaenidae	Polyommatinae	Azanus	ubaldus	KS16001	KS16001	Lycaenidae	MN829476	MN829476	TRUE	TRUE				MN829460
Boloria alaskensis	Boloria alaskensis (Holland, 1900)	Nymphalidae	Heliconiinae	Boloria	alaskensis	FS-b-2453	FS-b-2453	Heliconiinae_Limenitidinae	HQ161227	HQ161227	TRUE	TRUE				HQ161299							HQ161172
Boloria angarensis	Boloria angarensis (Erschoff, 1870)	Nymphalidae	Heliconiinae	Boloria	angarensis	NW151-7	NW151-7	Heliconiinae_Limenitidinae	HQ161283	HQ161283	TRUE	TRUE				HQ161349							HQ161212
Boloria aquilonaris	Boloria aquilonaris (Stichel, 1908)	Nymphalidae	Heliconiinae	Boloria	aquilonaris	NW96-16	NW96-16	Heliconiinae_Limenitidinae	GQ864746	GQ864746	TRUE	TRUE	GQ864525	GQ864621		GQ864840	GQ864936		GQ865074		GQ865301	GQ865404	GQ864434
Boloria chariclea	Boloria chariclea (Schneider, 1794)	Nymphalidae	Heliconiinae	Boloria	chariclea	FS-b-3723	FS-b-3723	Heliconiinae_Limenitidinae	HQ266650	HQ266650	TRUE	TRUE				HQ266656							HQ266644
Boloria dia	Boloria dia (Linnaeus, 1767)	Nymphalidae	Heliconiinae	Boloria	dia	NW156-24	NW156-24	Heliconiinae_Limenitidinae	HQ161287	HQ161287	TRUE	TRUE				HQ161353							HQ161216
Boloria eunomia	Boloria eunomia (Esper, 1800)	Nymphalidae	Heliconiinae	Boloria	eunomia	NW151-13	NW151-13	Heliconiinae_Limenitidinae	HQ161271	HQ161271	TRUE	TRUE				HQ161337							HQ161202
Boloria euphrosyne	Boloria euphrosyne (Linnaeus, 1758)	Nymphalidae	Heliconiinae	Boloria	euphrosyne	NW156-23	NW156-23	Heliconiinae_Limenitidinae	HQ161286	HQ161286	TRUE	TRUE				HQ161352	MN752789					MN752757	HQ161215
Boloria freija	Boloria freija (Thunberg, 1791)	Nymphalidae	Heliconiinae	Boloria	freija	FS-b-2405	FS-b-2405	Heliconiinae_Limenitidinae	HQ161224	HQ161224	TRUE	TRUE				HQ161296							HQ161169
Boloria frigga	Boloria frigga (Thunberg, 1791)	Nymphalidae	Heliconiinae	Boloria	frigga	NW151-19	NW151-19	Heliconiinae_Limenitidinae	HQ161275	HQ161275	TRUE	TRUE				HQ161341							HQ161204
Boloria graeca	Boloria graeca (Staudinger, 1870)	Nymphalidae	Heliconiinae	Boloria	graeca	FS-b-4220	FS-b-4220	Heliconiinae_Limenitidinae	HQ161252	HQ161252	TRUE	TRUE				HQ161324							HQ161193
Boloria improba	Boloria improba (Butler, 1877)	Nymphalidae	Heliconiinae	Boloria	improba	FS-b-2401	FS-b-2401	Heliconiinae_Limenitidinae	HQ161221	HQ161221	TRUE	TRUE				HQ161293							HQ161166
Boloria napaea	Boloria napaea (Hoffmansegg, 1804)	Nymphalidae	Heliconiinae	Boloria	napaea	FS-b-2465	FS-b-2465	Heliconiinae_Limenitidinae	HQ161230	HQ161230	TRUE	TRUE				HQ161302							HQ161175
Boloria oscarus	Boloria oscarus (Eversmann, 1844)	Nymphalidae	Heliconiinae	Boloria	oscarus	NW151-24	NW151-24	Heliconiinae_Limenitidinae	HQ161279	HQ161279	TRUE	TRUE				HQ161345							HQ161208
Boloria pales	Boloria pales ([Denis & Schiffermüller], 1775)	Nymphalidae	Heliconiinae	Boloria	pales	NW151-21	NW151-21	Heliconiinae_Limenitidinae	HQ161277	HQ161277	TRUE	TRUE				HQ161343							HQ161206
Boloria polaris	Boloria polaris (Boisduval, 1828)	Nymphalidae	Heliconiinae	Boloria	polaris	FS-b-3725	FS-b-3725	Heliconiinae_Limenitidinae	HQ266652	HQ266652	TRUE	TRUE				HQ266658							HQ266646
Boloria selene	Boloria selene ([Denis & Schiffermüller], 1775)	Nymphalidae	Heliconiinae	Boloria	selene	NW76-13	NW76-13	Heliconiinae_Limenitidinae	AY090201	AY090201	TRUE	TRUE				AY090167						MN752766	AY090134
Boloria selenis	Boloria selenis (Eversmann, 1837)	Nymphalidae	Heliconiinae	Boloria	selenis	LOWA106-06	2005-LOWA-106	Heliconiinae_Limenitidinae	FJ663375		FALSE	#N/A
Boloria thore	Boloria thore (Hübner, 1804)	Nymphalidae	Heliconiinae	Boloria	thore	NW151-22	NW151-22	Heliconiinae_Limenitidinae	HQ161278	HQ161278	TRUE	TRUE				HQ161344							HQ161207
Boloria titania	Boloria titania (Esper, 1793)	Nymphalidae	Heliconiinae	Boloria	titania	FS-b-3797	FS-b-3797	Heliconiinae_Limenitidinae	HQ161245	HQ161245	TRUE	TRUE				HQ161317							HQ161188
Boloria tritonia	Boloria tritonia (Böber, 1812)	Nymphalidae	Heliconiinae	Boloria	tritonia	NW151-8	NW151-8	Heliconiinae_Limenitidinae	HQ161284	HQ161284	TRUE	TRUE				HQ161350							HQ161213
Borbo borbonica	Borbo borbonica (Boisduval, 1833)	Hesperiidae	Hesperiinae	Borbo	borbonica	BMAD030-09	CCDB-02225-C06	Hesperiinae	HM404207		FALSE	#N/A
Brenthis daphne	Brenthis daphne ([Denis & Schiffermüller], 1775)	Nymphalidae	Heliconiinae	Brenthis	daphne	TS-12	TS-12	Heliconiinae_Limenitidinae	DQ922848	DQ922848	TRUE	TRUE				DQ922880	KY773429					KY773533	DQ922816
Brenthis hecate	Brenthis hecate ([Denis & Schiffermüller], 1775)	Nymphalidae	Heliconiinae	Brenthis	hecate	NW131-2	NW131-2	Heliconiinae_Limenitidinae	DQ922846	DQ922846	TRUE	TRUE				DQ922878	KY773386					KY773491	DQ922814
Brenthis ino	Brenthis ino (Rottemburg, 1775)	Nymphalidae	Heliconiinae	Brenthis	ino	NW95-1	NW95-1	Heliconiinae_Limenitidinae	DQ922847	DQ922847	TRUE	TRUE	GQ864526	GQ864622		DQ922879	KY773400			GQ865183	GQ865302	GQ865405	DQ922815
Brintesia circe	Brintesia circe (Fabricius, 1775)	Nymphalidae	Satyrinae	Brintesia	circe	CP-B01	CP-B01	Satyrinae2	DQ338865	DQ338865	TRUE	TRUE	EU141251	EU141291		DQ339020	EU141474		EU141527	EU141592	EU141656	EU141370	DQ338729
Cacyreus marshalli	Cacyreus marshalli Butler, 1898	Lycaenidae	Polyommatinae	Cacyreus	marshalli	AH95Y685	AH95Y685	Lycaenidae	EU919304	EU919304	TRUE	TRUE				GQ128703							GQ128914
Callophrys avis	Callophrys avis Chapman, 1909	Lycaenidae	Theclinae	Callophrys	avis	kmbs-WtH018	kmbs-WtH018	Lycaenidae	FN601274		FALSE	#N/A
Callophrys chalybeitincta	Callophrys chalybeitincta Sovinsky, 1905	Lycaenidae	Theclinae	Callophrys	chalybeitincta	CalCha	ILL_084	Lycaenidae	JF810410		FALSE	#N/A
Callophrys rubi	Callophrys rubi (Linnaeus, 1758)	Lycaenidae	Theclinae	Callophrys	rubi	MW06110	MW06110	Lycaenidae	MN829477		FALSE	#N/A
Callophrys suaveola	Callophrys suaveola (Staudinger, 1881)	Lycaenidae	Theclinae	Callophrys	suaveola	kmbs-WtH061	kmbs-WtH061	Lycaenidae	FN601311		FALSE	#N/A
Carcharodus alceae	Carcharodus alceae (Esper, 1780)	Hesperiidae	Pyrginae	Carcharodus	alceae	640-ADW	RV07E662	Pyrginae	HQ004157	EU364380	TRUE	TRUE	KX947052	KY045551		EU364175			KY027761	KY028011	KY028276	KY028527	EU363982
Carcharodus baeticus	Carcharodus baeticus (Rambur, 1839)	Hesperiidae	Pyrginae	Carcharodus	baeticus	Rvcoll.12-M706	RV12M706	Pyrginae	KP870838		FALSE	#N/A
Carcharodus floccifera	Carcharodus floccifera (Zeller, 1847)	Hesperiidae	Pyrginae	Carcharodus	floccifera	RV08M794	RV08M794	Pyrginae	HQ004168		FALSE	#N/A
Carcharodus lavatherae	Carcharodus lavatherae (Esper, 1783)	Hesperiidae	Pyrginae	Carcharodus	lavatherae	RV07E673	RV07E673	Pyrginae	HQ004176		FALSE	#N/A
Carcharodus orientalis	Carcharodus orientalis Reverdin, 1913	Hesperiidae	Pyrginae	Carcharodus	orientalis	RV08M437	RV08M437	Pyrginae	HQ004187		FALSE	#N/A
Carcharodus stauderi	Carcharodus stauderi Reverdin, 1913	Hesperiidae	Pyrginae	Carcharodus	stauderi	WMB1350-13	RVcoll.12-N297	Pyrginae	WMB1350-13		FALSE	#N/A
Carcharodus tripolinus	Carcharodus tripolinus (Verity, 1925)	Hesperiidae	Pyrginae	Carcharodus	tripolinus	RV06G506	RV08H982	Pyrginae	GU676920		FALSE	#N/A
Carterocephalus palaemon	Carterocephalus palaemon (Pallas, 1771)	Hesperiidae	Heteropterinae	Carterocephalus	palaemon	228-ADW	RV06K682	Hesperiinae	HQ004191	EU364388	TRUE	TRUE	KX947054	KY045552		EU364183	KY027506		KY027763	KY028013		KY028529	EU363990
Carterocephalus silvicola	Carterocephalus silvicola (Meigen, 1829)	Hesperiidae	Heteropterinae	Carterocephalus	silvicola	MM00616	MM00616	Hesperiinae	JN204963	JN204963	TRUE	TRUE		JN204936		JN204979			JN205003	JN205021		JN205030	JN204921
Catopsilia florella	Catopsilia florella (Fabricius, 1775)	Pieridae	Coliadinae	Catopsilia	florella	BMAD026-09	CCDB-02225-C02	Pieridae	HM404203		TRUE	FALSE				AY870569								EF-1a substituted by C. pomona
Celastrina argiolus	Celastrina argiolus (Linnaeus, 1758)	Lycaenidae	Polyommatinae	Celastrina	argiolus	RV08P034	RV08P034	Lycaenidae	JN827875		TRUE	FALSE				JX495376
Charaxes jasius	Charaxes jasius (Linnaeus, 1767)	Nymphalidae	Charaxinae	Charaxes	jasius	NW78-3	NW147-3	Charaxinae	GQ256824	GQ256824	TRUE	FALSE		EU152474	EU141449	GQ256950			EU141581	EU141645	GQ257052	GQ257152	GQ256703	partly substituted (CAD, DDC, IDH, MDH) by Charaxes castor; COI sequence AY09021 of C. castor (voucher NW78-3) is 98.4% identical to European and 99.4% to African C. jasius; similarity of nuclear loci is between 98.7% (wingless) and 99.7% (EF-1a, RpS2, RpS5)
Chazara briseis	Chazara briseis (Linnaeus, 1764)	Nymphalidae	Satyrinae	Chazara	briseis	EW26-19	EW26-19	Satyrinae2	DQ338866	DQ338866	TRUE	TRUE				DQ339021	GQ357502					GQ357628	DQ338730
Chazara persephone	Chazara persephone (Hübner, 1805)	Nymphalidae	Satyrinae	Chazara	persephone	IRANB272-08	VNLEP00084	Satyrinae2	IRANB272-08		FALSE	#N/A
Chazara prieuri	Chazara prieuri (Pierret, 1837)	Nymphalidae	Satyrinae	Chazara	prieuri	RV08J472	RV08J472	Satyrinae2	KP871166		FALSE	#N/A
Cigaritis acamas	Cigaritis acamas (Klug, 1834)	Lycaenidae	Aphnaeinae	Cigaritis	acamas	TBBUT1686-12	BC-TB9599	Lycaenidae	TBBUT1686-12		FALSE	#N/A
Coenonympha amaryllis	Coenonympha amaryllis (Stoll, 1782)	Nymphalidae	Satyrinae	Coenonympha	amaryllis	UK2-21	UK2-21	Satyrinae3	EU920743	EU920743	TRUE	TRUE				EU920776							EU920806
Coenonympha arcania	Coenonympha arcania (Linnaeus, 1760)	Nymphalidae	Satyrinae	Coenonympha	arcania	EW7-6	EW7-6	Satyrinae3	EU920744	EU920744	TRUE	TRUE				EU920777							EU920807
Coenonympha corinna	Coenonympha corinna (Hübner, 1804)	Nymphalidae	Satyrinae	Coenonympha	corinna	UK2-14	UK2-14	Satyrinae3	EU920745	EU920745	TRUE	TRUE				EU920779							EU920809
Coenonympha dorus	Coenonympha dorus (Esper, 1782)	Nymphalidae	Satyrinae	Coenonympha	dorus	UK2-23	UK2-23	Satyrinae3	EU920746	EU920746	TRUE	TRUE				EU920780							EU920810
Coenonympha gardetta	Coenonympha gardetta (Prunner, 1798)	Nymphalidae	Satyrinae	Coenonympha	gardetta	BC_ZSM_Lep_50420	BC_ZSM_Lep_50420	Satyrinae3	KP870381		TRUE	FALSE				EU920781							EU920811
Coenonympha glycerion	Coenonympha glycerion (Borkhausen, 1788)	Nymphalidae	Satyrinae	Coenonympha	glycerion	EW5-18	EW5-18	Satyrinae3	EU920749	EU920749	TRUE	TRUE				EU920783	GQ892089					GQ892095	EU920812
Coenonympha hero	Coenonympha hero (Linnaeus, 1760)	Nymphalidae	Satyrinae	Coenonympha	hero	EW3-14	EW3-14	Satyrinae3	EU920750	EU920750	TRUE	TRUE				EU920784							EU920813
Coenonympha leander	Coenonympha leander (Esper, 1784)	Nymphalidae	Satyrinae	Coenonympha	leander	UK2-2	UK2-2	Satyrinae3	EU920752	EU920752	TRUE	FALSE				MN829461
Coenonympha oedippus	Coenonympha oedippus (Fabricius, 1787)	Nymphalidae	Satyrinae	Coenonympha	oedippus	UK1-24	UK1-24	Satyrinae3	EU920755	EU920755	TRUE	TRUE				EU920788						GQ892096	EU920817
Coenonympha orientalis	Coenonympha orientalis Rebel, 1909	Nymphalidae	Satyrinae	Coenonympha	orientalis	JC08001	JC08001	Satyrinae3	MN829478	MN829478	TRUE	TRUE				MN829462
Coenonympha pamphilus	Coenonympha pamphilus (Linnaeus, 1758)	Nymphalidae	Satyrinae	Coenonympha	pamphilus	EW7-3	EW7-3	Satyrinae3	DQ338777	DQ338777	TRUE	TRUE				DQ338920	EU528385			EU528340		EU528428	DQ338637
Coenonympha phryne	Coenonympha phryne (Pallas, 1771)	Nymphalidae	Satyrinae	Coenonympha	phryne	CP16-21	CP16-21	Satyrinae3	EU920739	EU920739	TRUE	TRUE				EU920773	GQ357397					GQ357526	EU920804
Coenonympha rhodopensis	Coenonympha rhodopensis Elwes, 1900	Nymphalidae	Satyrinae	Coenonympha	rhodopensis	UK4-3	UK4-3	Satyrinae3	EU920756	EU920756	TRUE	TRUE				MN752741							EU920818
Coenonympha thyrsis	Coenonympha thyrsis (Freyer, 1845)	Nymphalidae	Satyrinae	Coenonympha	thyrsis	UK4-2	UK4-2	Satyrinae3	EU920761	EU920761	TRUE	TRUE				EU920794							EU920822
Coenonympha tullia	Coenonympha tullia (Müller, 1764)	Nymphalidae	Satyrinae	Coenonympha	tullia	DNA2245	DNA2245	Satyrinae3	FJ808815	FJ808815	TRUE	FALSE				AF173399						KF721263	EU920824
Colias alfacariensis	Colias alfacariensis Ribbe, 1905	Pieridae	Coliadinae	Colias	alfacariensis	NW17797	NW17797	Pieridae	MN752703	MN752703	TRUE	TRUE		MN752807		MN752738	MN752797		MN752772	MN752743		MN752762	MN752846
Colias aurorina	Colias aurorina Herrich-Schäffer, 1850	Pieridae	Coliadinae	Colias	aurorina	AC21-8	AC21-8	Pieridae	MN752704	MN752704	TRUE	TRUE				EF457742
Colias caucasica	Colias caucasica Staudinger, 1871	Pieridae	Coliadinae	Colias	caucasica	ColCau	ColCau	Pieridae	AF073943		FALSE	#N/A
Colias chrysotheme	Colias chrysotheme (Esper, 1781)	Pieridae	Coliadinae	Colias	chrysotheme	AC8-13	AC8-13	Pieridae	MN752705	MN752705	FALSE	TRUE
Colias crocea	Colias crocea (Geoffroy, 1785)	Pieridae	Coliadinae	Colias	crocea	NW17723	NW17723	Pieridae	MN752706	MN752706	TRUE	FALSE		MN752805		MN752736	MN752795		MN752771			MN752760	PRJNA432311
Colias erate	Colias erate (Esper, 1805)	Pieridae	Coliadinae	Colias	erate	AC8-10	AC8-10	Pieridae	KM046804	KM046804	TRUE	TRUE				HM236307							HM236308
Colias hecla	Colias hecla Lefèbvre, 1836	Pieridae	Coliadinae	Colias	hecla	cpm6	cpm6	Pieridae	EU583873	EU583873	FALSE	TRUE
Colias hyale	Colias hyale (Linnaeus, 1758)	Pieridae	Coliadinae	Colias	hyale	AC9-2	AC9-2	Pieridae	MN752707	MN752707	TRUE	TRUE				EF457744
Colias myrmidone	Colias myrmidone (Esper, 1781)	Pieridae	Coliadinae	Colias	myrmidone	RV06V650	RV06V650	Pieridae	HQ004303		FALSE	#N/A
Colias palaeno	Colias palaeno (Linnaeus, 1760)	Pieridae	Coliadinae	Colias	palaeno	MM03233	MM03233	Pieridae	GU828690	GU828486	TRUE	TRUE		GU828181		GU829301	GU829810		GU830077	GU830394		GU830680	GU829570
Colias phicomone	Colias phicomone (Esper, 1780)	Pieridae	Coliadinae	Colias	phicomone	AC8-11	AC8-11	Pieridae	MN752708	MN752708	FALSE	TRUE
Colias tyche	Colias tyche (Böber, 1812)	Pieridae	Coliadinae	Colias	tyche	MZH_JL5	MZH_JL5	Pieridae	HE775148		TRUE	TRUE									HE775204
Colotis evagore	Colotis evagore (Klug, 1829)	Pieridae	Pierinae	Colotis	evagore	NP13A032	NP13A032	Pieridae	PRJNA432311	PRJNA432311	TRUE	FALSE		PRJNA432311		JF293340	PRJNA432311		PRJNA432311	PRJNA432311	PRJNA432311	PRJNA432311	PRJNA432311
Cupido alcetas	Cupido alcetas (Hoffmansegg, 1804)	Lycaenidae	Polyommatinae	Cupido	alcetas	MAT99Q954	MAT99Q954	Lycaenidae	KP824778	KP824778	TRUE	TRUE				KP824781		KP824787					KP824791
Cupido argiades	Cupido argiades (Pallas, 1771)	Lycaenidae	Polyommatinae	Cupido	argiades	CupArg	CupArg	Lycaenidae	GU372537	GU372537	TRUE	TRUE				GU372629
Cupido decoloratus	Cupido decoloratus (Staudinger, 1886)	Lycaenidae	Polyommatinae	Cupido	decoloratus	RV08M655	RV08M655	Lycaenidae	HQ004326		TRUE	FALSE				KJ671885
Cupido lorquinii	Cupido lorquinii (Herrich-Schäffer, 1850)	Lycaenidae	Polyommatinae	Cupido	lorquinii	RV08L009	RV08L009	Lycaenidae	GU676459		FALSE	#N/A
Cupido minimus	Cupido minimus (Fuessly, 1775)	Lycaenidae	Polyommatinae	Cupido	minimus	AD00P540	AD00P540	Lycaenidae	GQ128947	GQ128947	TRUE	TRUE		GQ128563		GQ128636							GQ128845
Cupido osiris	Cupido osiris (Meigen, 1829)	Lycaenidae	Polyommatinae	Cupido	osiris	RV08M567	RV08M567	Lycaenidae	HQ004341		TRUE	FALSE				KJ671887
Cyaniris semiargus	Cyaniris semiargus (Rottemburg, 1775)	Lycaenidae	Polyommatinae	Cyaniris	semiargus	AD00P369	AD00P369	Lycaenidae	JX093483	JX093483	TRUE	FALSE		JX093260		JX093301		JX093339					JX093413
Cyclyrius webbianus	Cyclyrius webbianus (Brullé, 1839)	Lycaenidae	Polyommatinae	Cyclyrius	webbianus	MW15001	MW15001	Lycaenidae	KU648394	KU648394	FALSE	TRUE
Danaus chrysippus	Danaus chrysippus (Linnaeus, 1758)	Nymphalidae	Danainae	Danaus	chrysippus	DL-12-A049	DL-12-A049	Danainae	KP007606	KP007606	TRUE	TRUE				KP007757				KP008036	KP008079		KP007883
Danaus plexippus	Danaus plexippus (Linnaeus, 1758)	Nymphalidae	Danainae	Danaus	plexippus	NW108-21	NW108-21	Danainae	DQ018954	DQ018954	TRUE	TRUE		EU141304		DQ018921	EU141486		EU141540	EU141605	EU141667	EU141382	DQ018891
Erebia aethiopellus	Erebia aethiopellus (Hoffmansegg, 1806)	Nymphalidae	Satyrinae	Erebia	aethiopellus	HW1-1	HW1-1	Satyrinae2	KR138756		TRUE	TRUE					KR139008						KR139118
Erebia aethiops	Erebia aethiops (Esper, 1777)	Nymphalidae	Satyrinae	Erebia	aethiops	HW4-4	HW4-4	Satyrinae2	KR138772	KR138772	TRUE	TRUE					KR139021					KR138907	KR139132
Erebia albergana	Erebia albergana (Prunner, 1798)	Nymphalidae	Satyrinae	Erebia	albergana	JM8-12	JM8-12	Satyrinae2	KR138816		TRUE	TRUE					KR139056					KR138946	KR231856
Erebia arvernensis	Erebia arvernensis Oberthür, 1908	Nymphalidae	Satyrinae	Erebia	arvernensis	EreArv	EreArv	Satyrinae2	AY346222		FALSE	#N/A
Erebia calcarius	Erebia calcarius Lorković, 1953	Nymphalidae	Satyrinae	Erebia	calcarius	SIMGT1-05	SIMGT1-05	Satyrinae2	KX241499	KX241499	FALSE	TRUE
Erebia callias	Erebia callias Edwards, 1871	Nymphalidae	Satyrinae	Erebia	callias	JM9-3	JM9-3	Satyrinae2	KR138824	KR138824	TRUE	TRUE					KR139062					KR138954	KR139159
Erebia cassioides	Erebia cassioides (Hohenwarth, 1792)	Nymphalidae	Satyrinae	Erebia	cassioides	NW162-18	NW162-18	Satyrinae2	KR138836	KR138836	TRUE	TRUE				MN752742	KR139071					KR138966	KR231857
Erebia christi	Erebia christi Rätzer, 1890	Nymphalidae	Satyrinae	Erebia	christi	XM00001	XM00001	Satyrinae2	MN829479	MN829479	FALSE	TRUE
Erebia claudina	Erebia claudina (Borkhausen, 1789)	Nymphalidae	Satyrinae	Erebia	claudina	RW80003	RW80003	Satyrinae2	MN829480	MN829480	FALSE	TRUE
Erebia cyclopius	Erebia cyclopius (Eversmann, 1844)	Nymphalidae	Satyrinae	Erebia	cyclopius	CB10-4	2005-LOWA-750	Satyrinae2	FJ663475	KR138852	TRUE	FALSE					KR138974					KR138855	KR139082
Erebia dabanensis	Erebia dabanensis Erschoff, 1872	Nymphalidae	Satyrinae	Erebia	dabanensis	IS-137	IS-137	Satyrinae2	LC340560	LC340690	TRUE	FALSE					KR139034					KR138919	KR139148
Erebia disa	Erebia disa (Thunberg, 1791)	Nymphalidae	Satyrinae	Erebia	disa	PM11-03	PM11-03	Satyrinae2	KR138841	KR138841	TRUE	TRUE					KR139075					KR138971	KR139165
Erebia discoidalis	Erebia discoidalis (Kirby, 1837)	Nymphalidae	Satyrinae	Erebia	discoidalis	JM12-1	JM12-1	Satyrinae2	KR138807	KR138807	TRUE	TRUE					KR139048					KR138937	KR231860
Erebia edda	Erebia edda Ménétriés, 1851	Nymphalidae	Satyrinae	Erebia	edda	CB4-6	CB4-6	Satyrinae2	KR138736		TRUE	TRUE					KR138998					KR138879	KR139106
Erebia embla	Erebia embla (Thunberg, 1791)	Nymphalidae	Satyrinae	Erebia	embla	LEFID492-10	MM06449	Satyrinae2	HM873257		FALSE	#N/A
Erebia epiphron	Erebia epiphron (Knoch, 1783)	Nymphalidae	Satyrinae	Erebia	epiphron	EW24-2	EW24-2	Satyrinae2	KR138751	KR138751	TRUE	TRUE				DQ338921	KR139006					KR138888	KR139113
Erebia epistygne	Erebia epistygne (Hübner, 1819)	Nymphalidae	Satyrinae	Erebia	epistygne	IS-106	IS-106	Satyrinae2	MN752709	MN752709	TRUE	TRUE					MN752780					MN752753	MN752833
Erebia eriphyle	Erebia eriphyle (Freyer, 1836)	Nymphalidae	Satyrinae	Erebia	eriphyle	CB7-1	CB7-1	Satyrinae2	KR138738		TRUE	TRUE					KR139000					KR138881	KR139108
Erebia euryale	Erebia euryale (Esper, 1805)	Nymphalidae	Satyrinae	Erebia	euryale	NW162-17	NW162-17	Satyrinae2	KR138835	KR138835	TRUE	TRUE				MN752733	KR139070					KR138965	KR231863
Erebia fasciata	Erebia fasciata Butler, 1868	Nymphalidae	Satyrinae	Erebia	fasciata	CB4-9	CB4-9	Satyrinae2	KR138737		TRUE	TRUE					KR138999					KR138880	KR139107
Erebia flavofasciata	Erebia flavofasciata Heyne, 1895	Nymphalidae	Satyrinae	Erebia	flavofasciata	HW1-6	HW1-6	Satyrinae2	KR138764		TRUE	TRUE										KR138899	KR139126
Erebia gorge	Erebia gorge (Hübner, 1804)	Nymphalidae	Satyrinae	Erebia	gorge	HW5-3	HW5-3	Satyrinae2	KR138779	KR138779	TRUE	TRUE					KR139025					KR138911	KR139137
Erebia gorgone	Erebia gorgone Boisduval, 1833	Nymphalidae	Satyrinae	Erebia	gorgone	Rvcoll.140711ZG95	Rvcoll.140711ZG95	Satyrinae2	KP871128		FALSE	#N/A
Erebia hispania	Erebia hispania Butler, 1868	Nymphalidae	Satyrinae	Erebia	hispania	JM10-16	JM10-16	Satyrinae2	KR138803	KR138803	TRUE	TRUE					KR139045					KR138932	KR231866
Erebia jeniseiensis	Erebia jeniseiensis Trybom, 1877	Nymphalidae	Satyrinae	Erebia	jeniseiensis	JM9-11	JM9-11	Satyrinae2	MN752710		TRUE	TRUE										MN752756	MN752839
Erebia lefebvrei	Erebia lefebvrei (Boisduval, 1828)	Nymphalidae	Satyrinae	Erebia	lefebvrei	CB11-1	CB11-1	Satyrinae2	KR138713	KR138713	TRUE	TRUE					KR138976					KR138857	KR139084
Erebia ligea	Erebia ligea (Linnaeus, 1758)	Nymphalidae	Satyrinae	Erebia	ligea	EW5-19	EW5-19	Satyrinae2	DQ338779	DQ338779	TRUE	TRUE				DQ338922							DQ338639
Erebia manto	Erebia manto ([Denis & Schiffermüller], 1775)	Nymphalidae	Satyrinae	Erebia	manto	CB9-3	CB9-3	Satyrinae2	KR138740	KR138740	TRUE	TRUE					KR139002					KR138883	KR139110
Erebia medusa	Erebia medusa ([Denis & Schiffermüller], 1775)	Nymphalidae	Satyrinae	Erebia	medusa	IS-102	IS-102	Satyrinae2	KR138784	KR138784	TRUE	TRUE										KR138914	KR139139
Erebia melampus	Erebia melampus (Fuessly, 1775)	Nymphalidae	Satyrinae	Erebia	melampus	CB9-2	CB9-2	Satyrinae2	KR138739	KR138739	TRUE	TRUE					KR139001					KR138882	KR139109
Erebia melas	Erebia melas (Herbst, 1796)	Nymphalidae	Satyrinae	Erebia	melas	JM4-3	JM4-3	Satyrinae2	MN752711	MN752711	TRUE	TRUE					MN752788					MN752755	MN752850
Erebia meolans	Erebia meolans (Prunner, 1798)	Nymphalidae	Satyrinae	Erebia	meolans	EW24-10	EW24-10	Satyrinae2	KR138749	KR138749	TRUE	TRUE										KR138886	KR139112
Erebia mnestra	Erebia mnestra (Hübner, 1804)	Nymphalidae	Satyrinae	Erebia	mnestra	IS-107	IS-107	Satyrinae2	KR138786	KR138786	FALSE	TRUE
Erebia montana	Erebia montana (Prunner, 1798)	Nymphalidae	Satyrinae	Erebia	montana	HW1-25	TLMF_Lep_12599	Satyrinae2	KP253390	KR138844	TRUE	TRUE					KR139014					KR138897	KR139124
Erebia neleus	Erebia neleus (Freyer, 1832)	Nymphalidae	Satyrinae	Erebia	neleus	RV-06-V703	RV06V703	Satyrinae2	HQ004362		FALSE	#N/A
Erebia neoridas	Erebia neoridas (Boisduval, 1828)	Nymphalidae	Satyrinae	Erebia	neoridas	JM10-14	JM10-14	Satyrinae2	KR138801	KR138801	TRUE	TRUE					KR139044					KR138930	KR139156
Erebia nivalis	Erebia nivalis Lorković & Lesse, 1954	Nymphalidae	Satyrinae	Erebia	nivalis	BC_ZSM_Lep_53286	BC_ZSM_Lep_53286	Satyrinae2	KX044305		FALSE	#N/A
Erebia oeme	Erebia oeme (Hübner, 1804)	Nymphalidae	Satyrinae	Erebia	oeme	EW24-7	EW24-7	Satyrinae2	DQ338780	DQ338780	TRUE	TRUE	EU141255	EU141296		DQ338923	EU141479		EU141532	EU141597	EU141661	EU141375	DQ338640
Erebia orientalis	Erebia orientalis Elwes, 1900	Nymphalidae	Satyrinae	Erebia	orientalis	HW6-11	HW6-11	Satyrinae2	KR138782	KR138782	TRUE	TRUE					KR139027
Erebia ottomana	Erebia ottomana Herrich-Schäffer, 1847	Nymphalidae	Satyrinae	Erebia	ottomana	JM9-6	JM9-6	Satyrinae2	KR138826	KR138826	TRUE	TRUE					KR139064					KR138956	KR231878
Erebia palarica	Erebia palarica Chapman, 1905	Nymphalidae	Satyrinae	Erebia	palarica	EW9-4	EW9-4	Satyrinae2	KR138755	KR138755	TRUE	TRUE				AY090178	GQ357422					GQ357551	KR139117
Erebia pandrose	Erebia pandrose (Borkhausen, 1788)	Nymphalidae	Satyrinae	Erebia	pandrose	AB7-2	AB7-2	Satyrinae2	KR138708	KR138708	TRUE	TRUE					KR138972					KR138853	KR139076
Erebia pharte	Erebia pharte (Hübner, 1804)	Nymphalidae	Satyrinae	Erebia	pharte	JM8-13	JM8-13	Satyrinae2	KR138817	KR138817	TRUE	TRUE					KR139057					KR138947	KR231881
Erebia pluto	Erebia pluto (Prunner, 1798)	Nymphalidae	Satyrinae	Erebia	pluto	CB1-2	BC_ZSM_Lep_50318	Satyrinae2	KX040618	KR138846	TRUE	TRUE					KR138981					KR138862	KR139089
Erebia polaris	Erebia polaris Staudinger, 1861	Nymphalidae	Satyrinae	Erebia	polaris	MM10584	MM10584	Satyrinae2	HQ570389		FALSE	#N/A
Erebia pronoe	Erebia pronoe (Esper, 1780)	Nymphalidae	Satyrinae	Erebia	pronoe	HW5-8	HW5-8	Satyrinae2	KR138780	KR138780	TRUE	TRUE					KR139026					KR138912	KR139138
Erebia rhodopensis	Erebia rhodopensis Nicholl, 1900	Nymphalidae	Satyrinae	Erebia	rhodopensis	HW5-10	HW5-10	Satyrinae2	KR138773	KR138773	TRUE	TRUE											KR139133
Erebia rondoui	Erebia rondoui Oberthür, 1908	Nymphalidae	Satyrinae	Erebia	rondoui	RV08R184	RV08R184	Satyrinae2	KP870785		FALSE	#N/A
Erebia rossii	Erebia rossii (Curtis, 1835)	Nymphalidae	Satyrinae	Erebia	rossii	JM10-13	JM10-13	Satyrinae2	KR138800	KR138800	TRUE	TRUE					KR139043					KR138929	KR231882
Erebia scipio	Erebia scipio Boisduval, 1833	Nymphalidae	Satyrinae	Erebia	scipio	ZF-LY-002100	ZF-LY-002100	Satyrinae2	LC340559		FALSE	#N/A
Erebia sthennyo	Erebia sthennyo Graslin, 1850	Nymphalidae	Satyrinae	Erebia	sthennyo	EW24-1	EW24-1	Satyrinae2	KR138748	KR138748	TRUE	TRUE				DQ338924	KR139005					KR138885	DQ338641
Erebia stiria	Erebia stiria (Godart, 1824)	Nymphalidae	Satyrinae	Erebia	stiria	IS-133	IS-133	Satyrinae2	MN752712	MN752712	FALSE	TRUE
Erebia styx	Erebia styx (Freyer, 1834)	Nymphalidae	Satyrinae	Erebia	styx	IS-65	IS-65	Satyrinae2	KR138797	KR138797	TRUE	TRUE					KR139040					KR138925	KR139154
Erebia sudetica	Erebia sudetica Staudinger, 1861	Nymphalidae	Satyrinae	Erebia	sudetica	RV07E474	RV07E474	Satyrinae2	HQ004450		TRUE	TRUE										KR138960
Erebia triarius	Erebia triarius (Prunner, 1798)	Nymphalidae	Satyrinae	Erebia	triarius	EW9-2	EW9-2	Satyrinae2	MN752713	MN752713	TRUE	TRUE				DQ338925	MN752778					MN752750	MN752831
Erebia tyndarus	Erebia tyndarus (Esper, 1781)	Nymphalidae	Satyrinae	Erebia	tyndarus	HW2-12	HW2-12	Satyrinae2	MN752714	MN752714	TRUE	TRUE					MN752779					MN752752	MN752832
Erebia zapateri	Erebia zapateri Oberthür, 1875	Nymphalidae	Satyrinae	Erebia	zapateri	RV08L259	RV08L259	Satyrinae2	KP871117		FALSE	#N/A
Erynnis marloyi	Erynnis marloyi (Boisduval, 1834)	Hesperiidae	Pyrginae	Erynnis	marloyi	HSPEC673-11	HESP-EB_01608	Pyrginae	JF851939		FALSE	#N/A
Erynnis tages	Erynnis tages (Linnaeus, 1758)	Hesperiidae	Pyrginae	Erynnis	tages	RV08M309	RV08M309	Pyrginae	HQ004461		TRUE	FALSE											EU442875
Euchloe ausonia	Euchloe ausonia (Hübner, 1804)	Pieridae	Pierinae	Euchloe	ausonia	RV08M455	RV08M455	Pieridae	HQ004469		FALSE	#N/A
Euchloe bazae	Euchloe bazae Fabiano, 1993	Pieridae	Pierinae	Euchloe	bazae	RVcoll.10-A203	RV10A203	Pieridae	KP871161		FALSE	#N/A
Euchloe belemia	Euchloe belemia (Esper, 1800)	Pieridae	Pierinae	Euchloe	belemia	RVcoll.11-D924	RV11D924	Pieridae	KP870588	KP870588	FALSE	TRUE
Euchloe charlonia	Euchloe charlonia (Donzel, 1842)	Pieridae	Pierinae	Euchloe	charlonia	NW107-2	MT07001	Pieridae	KC462784		TRUE	FALSE		KM046913		KM046911	KM046861			KM046689		KM046621	KM046571
Euchloe crameri	Euchloe crameri Butler, 1869	Pieridae	Pierinae	Euchloe	crameri	BAFec004	BAFec004	Pieridae	EU700964	EU700964	FALSE	TRUE
Euchloe eversi	Euchloe eversi Stamm, 1963	Pieridae	Pierinae	Euchloe	eversi	BAFebe003	BAFebe003	Pieridae	EU700946	EU700946	FALSE	TRUE
Euchloe grancanariensis	Euchloe grancanariensis Acosta, 2008	Pieridae	Pierinae	Euchloe	grancanariensis	BAFebg003	BAFebg003	Pieridae	EU700949	EU700949	FALSE	TRUE
Euchloe hesperidum	Euchloe hesperidum Rothschild, 1913	Pieridae	Pierinae	Euchloe	hesperidum	BAFebh002	BAFebh002	Pieridae	EU700951	EU700951	FALSE	TRUE
Euchloe insularis	Euchloe insularis (Staudinger, 1861)	Pieridae	Pierinae	Euchloe	insularis	WMB2453-13	WMB2453-13	Pieridae	MN141833		FALSE	#N/A
Euchloe penia	Euchloe penia (Freyer, 1851)	Pieridae	Pierinae	Euchloe	penia	kmbs-WB031	kmbs-WB031	Pieridae	AM418415		FALSE	#N/A
Euchloe simplonia	Euchloe simplonia (Freyer, 1829)	Pieridae	Pierinae	Euchloe	simplonia	BC_Back_0059	BC_Back_0059	Pieridae	KX071573		FALSE	#N/A
Euchloe tagis	Euchloe tagis (Hübner, 1804)	Pieridae	Pierinae	Euchloe	tagis	BAFet002	BAFet002	Pieridae	EU700960	EU700960	FALSE	TRUE
Eumedonia eumedon	Eumedonia eumedon (Esper, 1780)	Lycaenidae	Polyommatinae	Eumedonia	eumedon	AD03B062	AD03B062	Lycaenidae	GQ128953	GQ128953	TRUE	TRUE		GQ128570		GQ128642		GQ128744					GQ128851
Euphydryas aurinia	Euphydryas aurinia (Rottemburg, 1775)	Nymphalidae	Nymphalinae	Euphydryas	aurinia	NW6-4	NW6-4	Nymphalinae	AF187746	AF187746	TRUE	TRUE				AY788743							AY788504
Euphydryas cynthia	Euphydryas cynthia ([Denis & Schiffermüller], 1775)	Nymphalidae	Nymphalinae	Euphydryas	cynthia	NW6-2	NW6-2	Nymphalinae	AF153925		FALSE	#N/A
Euphydryas desfontainii	Euphydryas desfontainii (Godart, 1819)	Nymphalidae	Nymphalinae	Euphydryas	desfontainii	NW70-4	NW70-4	Nymphalinae	AY090226	AY090226	TRUE	TRUE				AY090193							AY090159
Euphydryas iduna	Euphydryas iduna (Dalman, 1816)	Nymphalidae	Nymphalinae	Euphydryas	iduna	NW28-1	NW28-1	Nymphalinae	AF187776	AF187776	TRUE	TRUE											MN752849
Euphydryas intermedia	Euphydryas intermedia (Ménétriés, 1859)	Nymphalidae	Nymphalinae	Euphydryas	intermedia	NW6-3	NW6-3	Nymphalinae	AF187777	AF187777	TRUE	TRUE				KX824703							KX824735
Euphydryas maturna	Euphydryas maturna (Linnaeus, 1758)	Nymphalidae	Nymphalinae	Euphydryas	maturna	NW1-8	NW1-8	Nymphalinae	AF187782	AF187782	TRUE	TRUE				MN752740							MN752848
Fabriciana adippe	Fabriciana adippe ([Denis & Schiffermüller], 1775)	Nymphalidae	Heliconiinae	Fabriciana	adippe	NW95-4	NW95-4	Heliconiinae_Limenitidinae	KY773303	KY773303	TRUE	TRUE				KY773347	KY773401				MN752815	KY773505	KY773451
Fabriciana elisa	Fabriciana elisa (Godart, 1823)	Nymphalidae	Heliconiinae	Fabriciana	elisa	NW142-17	NW142-17	Heliconiinae_Limenitidinae	KY773297	KY773297	TRUE	TRUE				KY773341	KY773393					KY773498	KY773445
Fabriciana niobe	Fabriciana niobe (Linnaeus, 1758)	Nymphalidae	Heliconiinae	Fabriciana	niobe	NW17892	NW17892	Heliconiinae_Limenitidinae	KY773335	KY773335	TRUE	TRUE				KY773379	KY773439		MN752774				KY773483
Favonius quercus	Favonius quercus (Linnaeus, 1758)	Lycaenidae	Theclinae	Favonius	quercus	MM04799	MM04799	Lycaenidae	GU828706	GU828501	TRUE	TRUE		JN204939		GU829029			GU830092	GU830410		GU830694	GU829582
Freyeria trochylus	Freyeria trochylus (Freyer, 1844)	Lycaenidae	Polyommatinae	Freyeria	trochylus	VL01L462	VL01L462	Lycaenidae	GQ128955	GQ128955	TRUE	TRUE		GQ128572		GQ128644		GQ128746					GQ128853
Gegenes nostrodamus	Gegenes nostrodamus (Fabricius, 1793)	Hesperiidae	Hesperiinae	Gegenes	nostrodamus	RV06A259	RV06A259	Hesperiinae	GU676828		FALSE	#N/A
Gegenes pumilio	Gegenes pumilio (Hoffmansegg, 1804)	Hesperiidae	Hesperiinae	Gegenes	pumilio	Rvcoll.12-M906	RV12M906	Hesperiinae	KP870350		FALSE	#N/A
Glabroculus cyane	Glabroculus cyane (Eversmann, 1837)	Lycaenidae	Polyommatinae	Glabroculus	cyane	VL02X159	VL02X159	Lycaenidae	JX093489	JX093489	TRUE	TRUE		JX093275		JX093283		JX093356					JX093434
Glaucopsyche alexis	Glaucopsyche alexis (Poda, 1761)	Lycaenidae	Polyommatinae	Glaucopsyche	alexis	JD03A505	JD03A505	Lycaenidae	AY675413	AY675413	TRUE	FALSE				AY675366		HQ917971
Glaucopsyche melanops	Glaucopsyche melanops (Boisduval, 1828)	Lycaenidae	Polyommatinae	Glaucopsyche	melanops	RV08J370	RV08J370	Lycaenidae	JF262055	JF262055	TRUE	TRUE				JF271992		HQ917969					HQ918000
Glaucopsyche paphos	Glaucopsyche paphos Chapman, 1920	Lycaenidae	Polyommatinae	Glaucopsyche	paphos	EJ15001	EJ15001	Lycaenidae	MN829481	MN829481	TRUE	TRUE				MN829463
Gonepteryx cleobule	Gonepteryx cleobule (Hübner, 1831)	Pieridae	Coliadinae	Gonepteryx	cleobule	AF074004	AF074004	Pieridae	AF074004		FALSE	#N/A
Gonepteryx cleopatra	Gonepteryx cleopatra (Linnaeus, 1767)	Pieridae	Coliadinae	Gonepteryx	cleopatra	RE-07-G166	RE07G166	Pieridae	KM046813		TRUE	TRUE		KM046524			KM046870		KM046761			KM046630	KM046578
Gonepteryx farinosa	Gonepteryx farinosa (Zeller, 1847)	Pieridae	Coliadinae	Gonepteryx	farinosa	LOWA319-06	2005-LOWA-319	Pieridae	FJ663593		FALSE	#N/A
Gonepteryx maderensis	Gonepteryx maderensis Felder, 1862	Pieridae	Coliadinae	Gonepteryx	maderensis	MW17012	MW17012	Pieridae	MN829482	MN829482	TRUE	TRUE				MN829464
Gonepteryx rhamni	Gonepteryx rhamni (Linnaeus, 1758)	Pieridae	Coliadinae	Gonepteryx	rhamni	NW17718	NW17718	Pieridae	MN752715	MN752715	TRUE	TRUE		MN752804		MN752735	MN752794		MN752770			MN752759	MN752844
Hamearis lucina	Hamearis lucina (Linnaeus, 1758)	Riodinidae	Nemeobiinae	Hamearis	lucina	NW84-13	NW84-13	Lycaenidae	DQ018953	DQ018953	TRUE	TRUE	EU141287	EU141346	EU141438	DQ018920		EU141648	EU141584	EU141648	EU141702	EU141425	DQ018890
Hesperia comma	Hesperia comma (Linnaeus, 1758)	Hesperiidae	Hesperiinae	Hesperia	comma	VL05N271	VL05N271	Hesperiinae	PRJNA432311	PRJNA432311	TRUE	FALSE		PRJNA432311		PRJNA432311	PRJNA432311		PRJNA432311	PRJNA432311	PRJNA432311	PRJNA432311	AY700716
Heteropterus morpheus	Heteropterus morpheus (Pallas, 1771)	Hesperiidae	Heteropterinae	Heteropterus	morpheus	ZF-LY-002552	ZFLY2552	Hesperiinae	KY019772	KY019772	TRUE	TRUE				KY014365	KY027571			KY028080			KY019980
Hipparchia aristaeus	Hipparchia aristaeus (Bonelli, 1826)	Nymphalidae	Satyrinae	Hipparchia	aristaeus	JL9-14	JL9-14	Satyrinae2	MN752716	MN752716	TRUE	TRUE					MN752784						MN752835
Hipparchia autonoe	Hipparchia autonoe (Esper, 1783)	Nymphalidae	Satyrinae	Hipparchia	autonoe	NW173-1	NW173-1	Satyrinae2	MN752717		TRUE	FALSE				GU372609	MN752791						KM200294
Hipparchia azorina	Hipparchia azorina (Strecker, 1899)	Nymphalidae	Satyrinae	Hipparchia	azorina	MW16004	MW16004	Satyrinae2	MN829483	MN829483	TRUE	TRUE				MN829465
Hipparchia bacchus	Hipparchia bacchus (Higgins, 1967)	Nymphalidae	Satyrinae	Hipparchia	bacchus	MW17008	MW17008	Satyrinae2	MN829484	MN829484	TRUE	TRUE				MN829466
Hipparchia blachieri	Hipparchia blachieri (Fruhstorfer, 1908)	Nymphalidae	Satyrinae	Hipparchia	blachieri	WMB543-11	WMB543-11	Satyrinae2	MN140776		FALSE	#N/A
Hipparchia christenseni	Hipparchia christenseni Kudrna, 1977	Nymphalidae	Satyrinae	Hipparchia	christenseni	EULEP674-15	RVcoll.11-J514	Satyrinae2	EULEP674-15		FALSE	#N/A
Hipparchia cretica	Hipparchia cretica (Rebel, 1916)	Nymphalidae	Satyrinae	Hipparchia	cretica	JL9-2	JL9-2	Satyrinae2	MN752718	MN752718	TRUE	FALSE				MN829467	MN752786						MN752837
Hipparchia cypriensis	Hipparchia cypriensis (Holik, 1949)	Nymphalidae	Satyrinae	Hipparchia	cypriensis	GWOSF829-10	BC_ZSM_Lep_45815	Satyrinae2	JF850406		FALSE	#N/A
Hipparchia fagi	Hipparchia fagi (Scopoli, 1763)	Nymphalidae	Satyrinae	Hipparchia	fagi	RV06V700	RV06V700	Satyrinae2	HQ004526		FALSE	#N/A
Hipparchia fatua	Hipparchia fatua Freyer, 1843	Nymphalidae	Satyrinae	Hipparchia	fatua	EW25-24	EW25-24	Satyrinae2	DQ338596	DQ338596	TRUE	TRUE				DQ339024	GQ357503					GQ357629	DQ338733
Hipparchia fidia	Hipparchia fidia (Linnaeus, 1767)	Nymphalidae	Satyrinae	Hipparchia	fidia	JL9-6	JL9-6	Satyrinae2	MN752719	MN752719	TRUE	TRUE					MN752787						MN752838
Hipparchia gomera	Hipparchia gomera (Higgins, 1967)	Nymphalidae	Satyrinae	Hipparchia	gomera	PO15002	PO15002	Satyrinae2	MN829485	MN829485	TRUE	TRUE				MN829468
Hipparchia hermione	Hipparchia hermione (Linnaeus, 1764)	Nymphalidae	Satyrinae	Hipparchia	hermione	RV08H962	RV08H962	Satyrinae2	GU676908		FALSE	#N/A
Hipparchia leighebi	Hipparchia leighebi Kudrna, 1976	Nymphalidae	Satyrinae	Hipparchia	leighebi	WMB2771-13	WMB2771-13	Satyrinae2	MN140898		FALSE	#N/A
Hipparchia maderensis	Hipparchia maderensis (Bethune-Baker, 1891)	Nymphalidae	Satyrinae	Hipparchia	maderensis	MW16017	MW16017	Satyrinae2	MN829486	MN829486	FALSE	TRUE
Hipparchia mersina	Hipparchia mersina (Staudinger, 1871)	Nymphalidae	Satyrinae	Hipparchia	mersina	JL9-19	JL9-19	Satyrinae2	MN752720	MN752720	TRUE	FALSE				MN829469	MN752785						MN752836
Hipparchia miguelensis	Hipparchia miguelensis (Le Cerf, 1935)	Nymphalidae	Satyrinae	Hipparchia	miguelensis	XM01002	XM01002	Satyrinae2	MN829487	MN829487	FALSE	TRUE
Hipparchia neapolitana	Hipparchia neapolitana (Stauder, 1921)	Nymphalidae	Satyrinae	Hipparchia	neapolitana	WMB4615-14	WMB4615-14	Satyrinae2	MN143731		FALSE	#N/A
Hipparchia neomiris	Hipparchia neomiris (Godart, 1823)	Nymphalidae	Satyrinae	Hipparchia	neomiris	JL9-13	JL9-13	Satyrinae2	MN752721	MN752721	TRUE	TRUE					MN752783
Hipparchia pellucida	Hipparchia pellucida (Stauder, 1924)	Nymphalidae	Satyrinae	Hipparchia	pellucida	NW175-1	NW175-1	Satyrinae2	MN752722		TRUE	FALSE				KY000501	MN752792						MN752842
Hipparchia sbordonii	Hipparchia sbordonii Kudrna, 1984	Nymphalidae	Satyrinae	Hipparchia	sbordonii	JL24-02	JL24-02	Satyrinae2	MN752723	MN752723	FALSE	TRUE
Hipparchia semele	Hipparchia semele (Linnaeus, 1758)	Nymphalidae	Satyrinae	Hipparchia	semele	EW24-25	EW24-25	Satyrinae2	DQ338868	DQ338868	TRUE	TRUE				DQ339023							DQ338732
Hipparchia senthes	Hipparchia senthes (Fruhstorfer, 1908)	Nymphalidae	Satyrinae	Hipparchia	senthes	GWOSK606-11	BC_ZSM_Lep_45307	Satyrinae2	KX041070		FALSE	#N/A
Hipparchia statilinus	Hipparchia statilinus (Hufnagel, 1766)	Nymphalidae	Satyrinae	Hipparchia	statilinus	RV07F536	RV07F536	Satyrinae2	HQ004537		FALSE	#N/A
Hipparchia syriaca	Hipparchia syriaca (Staudinger, 1871)	Nymphalidae	Satyrinae	Hipparchia	syriaca	NW172-19	NW172-19	Satyrinae2	MN752724		TRUE	TRUE					MN752790						MN752841
Hipparchia tamadabae	Hipparchia tamadabae Owen & Smith, 1992	Nymphalidae	Satyrinae	Hipparchia	tamadabae	MW11002	MW11002	Satyrinae2	MN829488		FALSE	#N/A
Hipparchia tilosi	Hipparchia tilosi Manil, 1984	Nymphalidae	Satyrinae	Hipparchia	tilosi	BT96001	BT96001	Satyrinae2	MN829489		FALSE	#N/A
Hipparchia volgensis	Hipparchia volgensis (Mazokhin-Porshnyakov, 1952)	Nymphalidae	Satyrinae	Hipparchia	volgensis	JL8-28	JL8-28	Satyrinae2	MN752725	MN752725	TRUE	FALSE				KY000502	MN752782						MN752834
Hipparchia wyssii	Hipparchia wyssii (Christ, 1889)	Nymphalidae	Satyrinae	Hipparchia	wyssii	JG15001	JG15001	Satyrinae2	MN829490	MN829490	TRUE	TRUE				MN829470
Hypolimnas misippus	Hypolimnas misippus (Linnaeus, 1764)	Nymphalidae	Nymphalinae	Hypolimnas	misippus	NW68-3	NW68-3	Nymphalinae	AY788635	AY788635	TRUE	TRUE	MG886947	MG887019		AY788754	MG887109			MG887199	MG887303	MG887406	AY788515
Hyponephele huebneri	Hyponephele huebneri Koçak, 1980	Nymphalidae	Satyrinae	Hyponephele	huebneri	LOWA178-06	2005-LOWA-178	Satyrinae2	FJ663658		FALSE	#N/A
Hyponephele lupina	Hyponephele lupina (Costa, 1836)	Nymphalidae	Satyrinae	Hyponephele	lupina	LOWA028-06	2005-LOWA-28	Satyrinae2	FJ663647		TRUE	FALSE				DQ338989
Hyponephele lycaon	Hyponephele lycaon (Kühn, 1774)	Nymphalidae	Satyrinae	Hyponephele	lycaon	RV03-H595	RV03-H595	Satyrinae2	KT448686	KT448686	TRUE	TRUE				KT448655							KT448714
Iolana debilitata	Iolana debilitata (Schultz, 1905)	Lycaenidae	Polyommatinae	Iolana	debilitata	JC96Q003	JC96Q003	Lycaenidae	AY675414	AY675414	TRUE	FALSE				AY675367							HQ918002
Iolana iolas	Iolana iolas (Ochsenheimer, 1816)	Lycaenidae	Polyommatinae	Iolana	iolas	MW15008	MW15008	Lycaenidae	MN829491	MN829491	TRUE	FALSE						HQ917972
Iphiclides feisthamelii	Iphiclides feisthamelii (Duponchel, 1832)	Papilionidae	Papilioninae	Iphiclides	feisthamelii	MW01114	MW01114	Papilionidae	AY556964		TRUE	TRUE				GQ374237
Iphiclides podalirius	Iphiclides podalirius (Linnaeus, 1758)	Papilionidae	Papilioninae	Iphiclides	podalirius	FS-a-6	FS-a-6	Papilionidae	AF170873	AF170873	TRUE	TRUE				AF173413						MN752751	DQ351129
Issoria eugenia	Issoria eugenia (Eversmann, 1847)	Nymphalidae	Heliconiinae	Issoria	eugenia	NW131-4	NW131-4	Heliconiinae_Limenitidinae	DQ922857	DQ922857	TRUE	TRUE	GQ864554	GQ864665		DQ922889	GQ864986		GQ865111		GQ865334	GQ865455	DQ922825
Issoria lathonia	Issoria lathonia (Linnaeus, 1758)	Nymphalidae	Heliconiinae	Issoria	lathonia	NW118-22	NW118-22	Heliconiinae_Limenitidinae	DQ922854	DQ922854	TRUE	TRUE				DQ922886	KY773384					KY773489	DQ922822
Kirinia climene	Kirinia climene (Esper, 1783)	Nymphalidae	Satyrinae	Kirinia	climene	CP10-08	CP10-08	Satyrinae1	GQ357184	GQ357184	TRUE	TRUE				GQ357252	GQ357386					GQ357514	GQ357318
Kirinia roxelana	Kirinia roxelana (Cramer, 1777)	Nymphalidae	Satyrinae	Kirinia	roxelana	CP10-09	CP10-09	Satyrinae1	DQ338767	DQ338767	TRUE	TRUE				DQ338908	GQ357387					GQ357515	DQ338615
Kretania eurypilus	Kretania eurypilus (Freyer, 1851)	Lycaenidae	Polyommatinae	Kretania	eurypilus	VL01L152	VL01L152	Lycaenidae	JX093457	JX093457	TRUE	TRUE		JX093265		JX093298		JX093345					JX093433
Kretania hesperica	Kretania hesperica (Rambur, 1839)	Lycaenidae	Polyommatinae	Kretania	hesperica	RVcoll.06-K689	RV06K689	Lycaenidae	GU676770		FALSE	#N/A
Kretania psylorita	Kretania psylorita (Freyer, 1845)	Lycaenidae	Polyommatinae	Kretania	psylorita	KerPsy	KrePsy	Lycaenidae	KU310890		FALSE	#N/A
Kretania pylaon	Kretania pylaon (Fischer, 1832)	Lycaenidae	Polyommatinae	Kretania	pylaon	AD00P066	AD00P066	Lycaenidae	GQ128990	GQ128990	TRUE	TRUE		GQ128608		GQ128679		GQ128781					GQ128888
Kretania sephirus	Kretania sephirus (Frivaldszky, 1835)	Lycaenidae	Polyommatinae	Kretania	sephirus	RV07D404	RV07D404	Lycaenidae	HQ004999		FALSE	#N/A
Kretania trappi	Kretania trappi (Verity, 1927)	Lycaenidae	Polyommatinae	Kretania	trappi	LEATG565-14	GBIFCH-BOL_LEPAA_0690	Lycaenidae	MK186460		FALSE	#N/A
Laeosopis roboris	Laeosopis roboris (Esper, 1789)	Lycaenidae	Theclinae	Laeosopis	roboris	RV08H913	RV08H913	Lycaenidae	GU676882		FALSE	#N/A
Lampides boeticus	Lampides boeticus (Linnaeus, 1767)	Lycaenidae	Polyommatinae	Lampides	boeticus	MWT93E012	MWT93E012	Lycaenidae	GQ129023	GQ129023	TRUE	TRUE				GQ128712		GQ128819					GQ128924
Lasiommata deidamia	Lasiommata deidamia (Eversmann, 1851)	Nymphalidae	Satyrinae	Lasiommata	deidamia	JL13-23	JL13-23	Satyrinae1	MN752726	MN752726	TRUE	FALSE				JX185962
Lasiommata maera	Lasiommata maera (Linnaeus, 1758)	Nymphalidae	Satyrinae	Lasiommata	maera	JL7-7	JL7-7	Satyrinae1	MN752727	MN752727	TRUE	TRUE											DQ176328
Lasiommata megera	Lasiommata megera (Linnaeus, 1767)	Nymphalidae	Satyrinae	Lasiommata	megera	EW24-23	EW24-23	Satyrinae1	DQ176351	DQ176351	TRUE	TRUE				GQ357253	GQ357388					GQ357516	DQ176326
Lasiommata paramegaera	Lasiommata paramegaera (Hübner, 1824)	Nymphalidae	Satyrinae	Lasiommata	paramegaera	WMB1148-13	RV11E157	Satyrinae1	MH420194		FALSE	#N/A
Lasiommata petropolitana	Lasiommata petropolitana (Fabricius, 1787)	Nymphalidae	Satyrinae	Lasiommata	petropolitana	EW24-21	EW24-21	Satyrinae1	DQ176352	DQ176352	TRUE	TRUE											DQ176327
Leptidea duponcheli	Leptidea duponcheli (Staudinger, 1871)	Pieridae	Dismorphiinae	Leptidea	duponcheli	RVcoll.10-C243	RV10C243	Pieridae	JF512572		TRUE	TRUE											JF513005
Leptidea juvernica	Leptidea juvernica Williams, 1946	Pieridae	Dismorphiinae	Leptidea	juvernica	RVcoll.LR08-D680	RVcoll.LR08-D680	Pieridae	JF512646		TRUE	TRUE		JF512759									JF512973
Leptidea morsei	Leptidea morsei (Fenton, 1882)	Pieridae	Dismorphiinae	Leptidea	morsei	RV-07-Z083	RV-07-Z083	Pieridae	GU372563	GU372563	TRUE	FALSE		JF512749		GU372654							JF512996
Leptidea reali	Leptidea reali Reissinger, 1990	Pieridae	Dismorphiinae	Leptidea	reali	RVcoll.07-E080	RV07E080	Pieridae	JF512658		TRUE	FALSE		JF512724		PRJNA432311							JF512964
Leptidea sinapis	Leptidea sinapis (Linnaeus, 1758)	Pieridae	Dismorphiinae	Leptidea	sinapis	NW149-5	NW149-5	Pieridae	GU828859	GU929821	TRUE	TRUE		GU828319		GU829162	GU829910		GU830237	GU830551	MN752816	GU830806	GU829708
Leptotes pirithous	Leptotes pirithous (Linnaeus, 1767)	Lycaenidae	Polyommatinae	Leptotes	pirithous	MW11005	MW11005	Lycaenidae	JQ080283	JQ080283	TRUE	FALSE				KJ671872
Libythea celtis	Libythea celtis (Laicharting, 1782)	Nymphalidae	Libytheinae	Libythea	celtis	NW71-1	NW71-1	Heliconiinae_Limenitidinae	AY090198	AY090198	TRUE	TRUE		EU141340	EU141437	AY090164	EU141517		EU141577	EU141641	EU141696	EU141418	AY090131
Limenitis camilla	Limenitis camilla (Linnaeus, 1764)	Nymphalidae	Limenitidinae	Limenitis	camilla	SPM029	SPM029	Heliconiinae_Limenitidinae	DQ205111	DQ205111	TRUE	TRUE				DQ208220	HQ291201		HQ291221			HQ291253	GQ985323
Limenitis populi	Limenitis populi (Linnaeus, 1758)	Nymphalidae	Limenitidinae	Limenitis	populi	SPM031	SPM031	Heliconiinae_Limenitidinae	DQ205105	DQ205105	TRUE	TRUE				DQ208227	HQ291204		HQ291227			HQ291256	GQ985325
Limenitis reducta	Limenitis reducta Staudinger, 1901	Nymphalidae	Limenitidinae	Limenitis	reducta	NW67-2	NW67-2	Heliconiinae_Limenitidinae	AY090217	AY090217	TRUE	TRUE	MG741840	EU141331	EU141453	AY090183	EU141509		EU141568	EU141632	EU141688	EU141409	AY090150
Lopinga achine	Lopinga achine (Scopoli, 1763)	Nymphalidae	Satyrinae	Lopinga	achine	EW3-6	EW3-6	Satyrinae1	DQ338769	DQ338769	TRUE	TRUE				DQ338910	GQ357389					GQ357517	DQ338617
Luthrodes galba	Luthrodes galba (Lederer, 1855)	Lycaenidae	Polyommatinae	Luthrodes	galba	HU08D004	HU08D004	Lycaenidae	JX093471	JX093471	TRUE	TRUE				JX093305
Lycaena alciphron	Lycaena alciphron (Rottemburg, 1775)	Lycaenidae	Lycaeninae	Lycaena	alciphron	JL10-14	JL10-14	Lycaenidae	JN204956	JN204956	TRUE	FALSE				JN204975			JN204998	JN205015		JN205041	Van Dorp (2003): NK00P719
Lycaena bleusei	Lycaena bleusei (Oberthür, 1884)	Lycaenidae	Lycaeninae	Lycaena	bleusei	KS07001	KS07001	Lycaenidae	MN829492		FALSE	#N/A
Lycaena candens	Lycaena candens (Herrich-Schäffer, 1844)	Lycaenidae	Lycaeninae	Lycaena	candens	MW00119	MW00119	Lycaenidae	AY556890		TRUE	FALSE				KJ671879							Van Dorp (2003): AD00P319
Lycaena dimorpha	Lycaena dimorpha (Staudinger, 1881)	Lycaenidae	Lycaeninae	Lycaena	dimorpha	BPAL118-10	RPVL-00118	Lycaenidae	HM404734		FALSE	#N/A
Lycaena dispar	Lycaena dispar ([Haworth], 1802)	Lycaenidae	Lycaeninae	Lycaena	dispar	LycDis	LycDis	Lycaenidae	GU372564	GU372564	TRUE	FALSE				GU372655							Van Dorp (2003): NK00P605
Lycaena helle	Lycaena helle ([Denis & Schiffermüller], 1775)	Lycaenidae	Lycaeninae	Lycaena	helle	SS_2	SS_2	Lycaenidae	KC208848		FALSE	#N/A
Lycaena hippothoe	Lycaena hippothoe (Linnaeus, 1760)	Lycaenidae	Lycaeninae	Lycaena	hippothoe	LEP22825	LEP22825	Lycaenidae	PRJNA432311	PRJNA432311	TRUE	FALSE		PRJNA432311		PRJNA432311	PRJNA432311		PRJNA432311	PRJNA432311	PRJNA432311	PRJNA432311	Van Dorp (2003): RDJ0207252
Lycaena ottomana	Lycaena ottomana (Lefèbvre, 1831)	Lycaenidae	Lycaeninae	Lycaena	ottomana	MW09049	MW09049	Lycaenidae	MN829493		FALSE	#N/A
Lycaena phlaeas	Lycaena phlaeas (Linnaeus, 1760)	Lycaenidae	Lycaeninae	Lycaena	phlaeas	JCO1118	JCO1118	Lycaenidae	GU372565	GU372565	TRUE	FALSE				FJ490506	AB696721						Van Dorp (2003): KVDphl2
Lycaena thersamon	Lycaena thersamon (Esper, 1784)	Lycaenidae	Lycaeninae	Lycaena	thersamon	RV-07-E444	RV07E444	Lycaenidae	HQ004678		FALSE	#N/A
Lycaena thetis	Lycaena thetis Klug, 1834	Lycaenidae	Lycaeninae	Lycaena	thetis	MW99520	MW99520	Lycaenidae	AY557116		TRUE	FALSE											Van Dorp (2003): VL01L402
Lycaena tityrus	Lycaena tityrus (Poda, 1761)	Lycaenidae	Lycaeninae	Lycaena	tityrus	JCO1207	JCO1207	Lycaenidae	FJ490481	FJ490481	TRUE	FALSE				FJ490509							Van Dorp (2003): MAT99Q934
Lycaena virgaureae	Lycaena virgaureae (Linnaeus, 1758)	Lycaenidae	Lycaeninae	Lycaena	virgaureae	JCO1116	JCO1116	Lycaenidae	FJ490477	FJ490477	TRUE	FALSE				FJ490505							Van Dorp (2003): VL99Q072
Lysandra albicans	Lysandra albicans (Gerhard, 1851)	Lycaenidae	Polyommatinae	Lysandra	albicans	MAT99Q969	MAT99Q969	Lycaenidae	KF834376	KF834376	TRUE	TRUE		KF834349				KF834441					KF834541
Lysandra bellargus	Lysandra bellargus (Rottemburg, 1775)	Lycaenidae	Polyommatinae	Lysandra	bellargus	AD00P129	AD00P129	Lycaenidae	JX093472	JX093472	TRUE	TRUE		JX093262		JX093299		JX093340					JX093410
Lysandra caelestissima	Lysandra caelestissima (Verity, 1921)	Lycaenidae	Polyommatinae	Lysandra	caelestissima	MAT99Q966	MAT99Q966	Lycaenidae	KF834402	KF834402	TRUE	TRUE		KF834321				KF834442					KF834537
Lysandra coridon	Lysandra coridon (Poda, 1761)	Lycaenidae	Polyommatinae	Lysandra	coridon	RV03H454	RV03H454	Lycaenidae	GQ128976	GQ128976	TRUE	FALSE		GQ128594		GQ128665		KF834427					GQ128874
Lysandra corydonius	Lysandra corydonius (Herrich-Schäffer, 1852)	Lycaenidae	Polyommatinae	Lysandra	corydonius	VL05N131	VL05N131	Lycaenidae	KF834367	KF834367	TRUE	FALSE		KF834330				KF834417					KF834554
Lysandra hispana	Lysandra hispana (Herrich-Schäffer, 1851)	Lycaenidae	Polyommatinae	Lysandra	hispana	MAT99T993	MAT99T993	Lycaenidae	KF834375	KF834375	TRUE	TRUE		KF834353				KF834430					KF834542
Maniola chia	Maniola chia Thomson, 1987	Nymphalidae	Satyrinae	Maniola	chia	M339	M339	Satyrinae2	KP032345		TRUE	TRUE				KP032619							KP032542
Maniola cypricola	Maniola cypricola (Graves, 1928)	Nymphalidae	Satyrinae	Maniola	cypricola	M14	M14	Satyrinae2	KP032254		TRUE	TRUE				KP032568							KP032522
Maniola halicarnassus	Maniola halicarnassus Thomson, 1990	Nymphalidae	Satyrinae	Maniola	halicarnassus	M187	M187	Satyrinae2	KP032313		TRUE	TRUE				KP032579							KP032512
Maniola jurtina	Maniola jurtina (Linnaeus, 1758)	Nymphalidae	Satyrinae	Maniola	jurtina	EW4-5	EW4-5	Satyrinae2	AY090214	AY090214	TRUE	TRUE	EU141256	EU141298		AY090180	EU141481		EU141534	EU141599	EU141662	EU141376	KR139116
Maniola megala	Maniola megala (Oberthür, 1909)	Nymphalidae	Satyrinae	Maniola	megala	M318	M318	Satyrinae2	KP032327		TRUE	TRUE				KP032601							KP032528
Maniola nurag	Maniola nurag (Ghiliani, 1852)	Nymphalidae	Satyrinae	Maniola	nurag	M32	M32	Satyrinae2	KP032268		TRUE	TRUE				KP032609							KP032486
Maniola telmessia	Maniola telmessia (Zeller, 1847)	Nymphalidae	Satyrinae	Maniola	telmessia	CP10-14	CP10-14	Satyrinae2	GQ357220	GQ357220	TRUE	FALSE				KP032564	GQ357459					GQ357589	KP032506
Melanargia arge	Melanargia arge (Sulzer, 1776)	Nymphalidae	Satyrinae	Melanargia	arge	VNMB307-08	GCB-M_8	Satyrinae2	GQ200904		TRUE	TRUE											GQ201377
Melanargia galathea	Melanargia galathea (Linnaeus, 1758)	Nymphalidae	Satyrinae	Melanargia	galathea	EW24-17	EW24-17	Satyrinae2	DQ338843	DQ338843	TRUE	TRUE				DQ338993	EU528398					EU528444	DQ338706
Melanargia ines	Melanargia ines (Hoffmansegg, 1804)	Nymphalidae	Satyrinae	Melanargia	ines	DNAwthmel_004	DNAwthmel_004	Satyrinae2	GQ201004		TRUE	TRUE											GQ201392
Melanargia lachesis	Melanargia lachesis (Hübner, 1790)	Nymphalidae	Satyrinae	Melanargia	lachesis	NW149-3	NW149-3	Satyrinae2	GQ357222	GQ357222	TRUE	TRUE				GQ357289	GQ357463					GQ357593	GQ357354
Melanargia larissa	Melanargia larissa (Geyer, 1828)	Nymphalidae	Satyrinae	Melanargia	larissa	DNAwthmel_195	DNAwthmel_195	Satyrinae2	GQ201060		TRUE	TRUE											GQ201397
Melanargia occitanica	Melanargia occitanica (Esper, 1793)	Nymphalidae	Satyrinae	Melanargia	occitanica	DNAwthmel_305	DNAwthmel_305	Satyrinae2	GQ201118		TRUE	TRUE											GQ201405
Melanargia pherusa	Melanargia pherusa (Boisduval, 1833)	Nymphalidae	Satyrinae	Melanargia	pherusa	WMB490-11	WMB490-11	Satyrinae2	MN145139		FALSE	#N/A
Melanargia russiae	Melanargia russiae (Esper, 1783)	Nymphalidae	Satyrinae	Melanargia	russiae	CP-AC23-83	CP-AC23-83	Satyrinae2	DQ338845	DQ338845	TRUE	TRUE				DQ338995							DQ338708
Melitaea aetherie	Melitaea aetherie (Hübner, 1826)	Nymphalidae	Nymphalinae	Melitaea	aetherie	NW103-12	NW103-12	Nymphalinae	FJ462230	FJ462230	TRUE	TRUE				FJ462290							FJ462165
Melitaea arduinna	Melitaea arduinna (Esper, 1783)	Nymphalidae	Nymphalinae	Melitaea	arduinna	NW23-5	NW23-5	Nymphalinae	AF187742	AF187742	TRUE	TRUE		KJ723520		AY788774						KJ723580	AY788534
Melitaea asteria	Melitaea asteria Freyer, 1828	Nymphalidae	Nymphalinae	Melitaea	asteria	NW142-19	NW142-19	Nymphalinae	FJ462233	FJ462233	TRUE	TRUE				FJ462296
Melitaea athalia	Melitaea athalia (Rottemburg, 1775)	Nymphalidae	Nymphalinae	Melitaea	athalia	NW76-14	NW76-14	Nymphalinae	FJ462234	FJ462234	TRUE	TRUE				FJ462297	MN752801					MN752767	FJ462171
Melitaea aurelia	Melitaea aurelia Nickerl, 1850	Nymphalidae	Nymphalinae	Melitaea	aurelia	NW23-2	NW23-2	Nymphalinae	AF187745	AF187745	TRUE	TRUE				FJ462299	MN752799					MN752764	FJ462173
Melitaea britomartis	Melitaea britomartis Assmann, 1847	Nymphalidae	Nymphalinae	Melitaea	britomartis	NW69-8	NW69-8	Nymphalinae	AY788655	AY788655	TRUE	TRUE				AY788775	MN752800					MN752765	AY788535
Melitaea celadussa	Melitaea celadussa Fruhstorfer, 1910	Nymphalidae	Nymphalinae	Melitaea	celadussa	AC6-14	AC6-14	Nymphalinae	FJ462240	FJ462240	TRUE	TRUE				FJ462306	MN752777					MN752749	FJ462179
Melitaea cinxia	Melitaea cinxia (Linnaeus, 1758)	Nymphalidae	Nymphalinae	Melitaea	cinxia	NW73-14	NW73-14	Nymphalinae	AY788656	AY788656	TRUE	TRUE	EU141284	EU141342		AY788776	EU141518		EU141579	EU141643	EU141698	EU141420	AY788536
Melitaea deione	Melitaea deione (Geyer, 1832)	Nymphalidae	Nymphalinae	Melitaea	deione	NW95-5	NW95-5	Nymphalinae	AY788657	AY788657	TRUE	TRUE		MN752813		AY788777	MN752802					MN752768	AY788537
Melitaea diamina	Melitaea diamina (Lang, 1789)	Nymphalidae	Nymphalinae	Melitaea	diamina	NW10-24	NW10-24	Nymphalinae	AF187761	AF187761	TRUE	TRUE				FJ462317							FJ462189
Melitaea didyma	Melitaea didyma (Esper, 1778)	Nymphalidae	Nymphalinae	Melitaea	didyma	NW17801	NW17801	Nymphalinae	MN752728	MN752728	TRUE	TRUE		MN752808		MN752739	MN752798		MN752773	MN752744		MN752763	MN752847
Melitaea ornata	Melitaea ornata Christoph, 1893	Nymphalidae	Nymphalinae	Melitaea	ornata	JL16-13	JL16-13	Nymphalinae	KJ723650	KJ723650	TRUE	TRUE		KJ723532		KJ723627	KJ723555			KJ723569		KJ723594	KJ723609
Melitaea parthenoides	Melitaea parthenoides Keferstein, 1851	Nymphalidae	Nymphalinae	Melitaea	parthenoides	JL1-2	JL1-2	Nymphalinae	FJ462271	FJ462271	TRUE	TRUE				FJ462339	MN752781					MN752754	FJ462211
Melitaea phoebe	Melitaea phoebe ([Denis & Schiffermüller], 1775)	Nymphalidae	Nymphalinae	Melitaea	phoebe	AC6-6	AC6-6	Nymphalinae	FJ462275	FJ462275	TRUE	TRUE		KJ723533		FJ462343				KJ723570		KJ723595	FJ462215
Melitaea trivia	Melitaea trivia ([Denis & Schiffermüller], 1775)	Nymphalidae	Nymphalinae	Melitaea	trivia	NW23-6	NW23-6	Nymphalinae	AF187810	AF187810	TRUE	TRUE		KJ723518		AY788782						KJ723577	AY788542
Melitaea varia	Melitaea varia Herrich-Schäffer, 1851	Nymphalidae	Nymphalinae	Melitaea	varia	NW24-13	NW24-13	Nymphalinae	AF187812	AF187812	TRUE	TRUE				AY788783							AY788543
Minois dryas	Minois dryas (Scopoli, 1763)	Nymphalidae	Satyrinae	Minois	dryas	GBLN4362-14	J006	Satyrinae2	AB855972	AB855972	TRUE	FALSE				JX495398
Muschampia cribrellum	Muschampia cribrellum (Eversmann, 1841)	Hesperiidae	Pyrginae	Muschampia	cribrellum	RV-07-D402	RV07D402	Pyrginae	HQ004831		FALSE	#N/A
Muschampia proto	Muschampia proto (Ochsenheimer, 1808)	Hesperiidae	Pyrginae	Muschampia	proto	RV07C087	RV07C087	Pyrginae	GU677031		FALSE	#N/A
Muschampia tessellum	Muschampia tessellum (Hübner, 1803)	Hesperiidae	Pyrginae	Muschampia	tessellum	ST-2011-54CI	ST-2011-54CI	Pyrginae	JQ922042		TRUE	FALSE				JX495379
Neolycaena rhymnus	Neolycaena rhymnus (Eversmann, 1832)	Lycaenidae	Theclinae	Neolycaena	rhymnus	LOWA442-06	2005-LOWA-442	Lycaenidae	FJ663839		TRUE	FALSE				KM211591
Neolysandra coelestina	Neolysandra coelestina (Eversmann, 1843)	Lycaenidae	Polyommatinae	Neolysandra	coelestina	AD00P092	AD00P092	Lycaenidae	JX093490	JX093490	TRUE	TRUE		JX093258		JX093303		JX093337					JX093417
Neptis rivularis	Neptis rivularis (Scopoli, 1763)	Nymphalidae	Limenitidinae	Neptis	rivularis	NW137-5	NW137-5	Heliconiinae_Limenitidinae	MG741086	MG741086	TRUE	TRUE				MG741687	MG741565		MG741507	MG741468			MG741921
Neptis sappho	Neptis sappho (Pallas, 1771)	Nymphalidae	Limenitidinae	Neptis	sappho	NW84-5	NW84-5	Heliconiinae_Limenitidinae	MG741100	MG741100	TRUE	TRUE				MG741701	MG741576		MG741511	MG741479			MG741934
Nymphalis antiopa	Nymphalis antiopa (Linnaeus, 1758)	Nymphalidae	Nymphalinae	Nymphalis	antiopa	NW70-2	NW70-2	Nymphalinae	AY218246	AY218246	TRUE	TRUE	MN752827			AY218266	FJ639524					FJ639579	AY218284
Nymphalis polychloros	Nymphalis polychloros (Linnaeus, 1758)	Nymphalidae	Nymphalinae	Nymphalis	polychloros	NW62-2	NW62-2	Nymphalinae	AY248788	AY248788	TRUE	TRUE	EU141270	EU141323	EU141444	AY248813	EU141502		EU141560	EU141624		EU141401	AY248829
Nymphalis vaualbum	Nymphalis vaualbum ([Denis & Schiffermüller], 1775)	Nymphalidae	Nymphalinae	Nymphalis	vaualbum	NW78-1	NW78-1	Nymphalinae	AY248791	AY248791	TRUE	TRUE	MN752829	MN752811	MN752824	AY248816	FJ639526		MN752775	MN752747		FJ639581	AY248832
Nymphalis xanthomelas	Nymphalis xanthomelas ([Denis & Schiffermüller], 1775)	Nymphalidae	Nymphalinae	Nymphalis	xanthomelas	NW84-1	NW84-1	Nymphalinae	AY248790	AY248790	TRUE	TRUE	MN752830	MN752812	MN752825	AY248815	FJ639527		MN752776	MN752748		FJ639582	AY248831
Ochlodes sylvanus	Ochlodes sylvanus (Esper, 1777)	Hesperiidae	Hesperiinae	Ochlodes	sylvanus	NW95-2	NW95-2	Hesperiinae	JN204953	JN204953	TRUE	TRUE		JN204945		JN204972			JN204996	JN205012		JN205038
Oeneis ammon	Oeneis ammon Elwes, 1899	Nymphalidae	Satyrinae	Oeneis	ammon	OE-12	OE-12	Satyrinae2	KP888656		TRUE	FALSE				LC155648	KP888700					KP888735	KP888773
Oeneis bore	Oeneis bore (Schneider, 1792)	Nymphalidae	Satyrinae	Oeneis	bore	OE-27	OE-27	Satyrinae2	KP888659		TRUE	FALSE				LC155706	KP888703					KP888737	KP888776
Oeneis glacialis	Oeneis glacialis (Moll, 1785)	Nymphalidae	Satyrinae	Oeneis	glacialis	OE-48	OE-48	Satyrinae2	KP888668		TRUE	FALSE				LC155690	KP888711					KP888746	KP888785
Oeneis jutta	Oeneis jutta (Hübner, 1806)	Nymphalidae	Satyrinae	Oeneis	jutta	EW4-1	EW4-1	Satyrinae2	DQ018958	DQ018958	TRUE	TRUE				DQ018925	GQ357506					GQ357632	DQ018896
Oeneis magna	Oeneis magna Graeser, 1888	Nymphalidae	Satyrinae	Oeneis	magna	CB12-17	CB12-17	Satyrinae2	KP888677	KP888677	TRUE	FALSE				LC155691	KP888718					KP888752	KP888794
Oeneis melissa	Oeneis melissa (Fabricius, 1775)	Nymphalidae	Satyrinae	Oeneis	melissa	OE-29	OE-29	Satyrinae2	KP888678	KP888678	TRUE	FALSE				LC155637	KP888719						KP888795
Oeneis norna	Oeneis norna (Thunberg, 1791)	Nymphalidae	Satyrinae	Oeneis	norna	CB12-16	CB12-16	Satyrinae2	KP888686		TRUE	FALSE				LC155692	KP888725					KP888757	KP888802
Oeneis polixenes	Oeneis polixenes (Fabricius, 1775)	Nymphalidae	Satyrinae	Oeneis	polixenes	EZBNB164-08	CBjS07-1066h	Satyrinae2	KT138931		TRUE	FALSE				LC155662
Oeneis tarpeia	Oeneis tarpeia (Pallas, 1771)	Nymphalidae	Satyrinae	Oeneis	tarpeia	AB7-6	AB7-6	Satyrinae2	KP888693	KP888693	TRUE	FALSE				LC155694	KP888730					KP888764	KP888809
Papilio alexanor	Papilio alexanor Esper, 1800	Papilionidae	Papilioninae	Papilio	alexanor	FS-b-40	FS-b-40	Papilionidae	AF044012	AF044012	TRUE	TRUE				GQ268390							GQ268407
Papilio hospiton	Papilio hospiton Gené, 1839	Papilionidae	Papilioninae	Papilio	hospiton	Paphos	PapHos	Papilionidae	AF044009	AF044009	TRUE	TRUE				AF044830
Papilio machaon	Papilio machaon Linnaeus, 1758	Papilionidae	Papilioninae	Papilio	machaon	FS-a-27	UASM_9900078	Papilionidae	AY457593	AY457593	TRUE	FALSE				EF485106							AY569124
Pararge aegeria	Pararge aegeria (Linnaeus, 1758)	Nymphalidae	Satyrinae	Pararge	aegeria	EW1-1	EW1-1	Satyrinae1	DQ176379	DQ176379	TRUE	TRUE				DQ338913	EU141476					EU141372	DQ338620
Pararge xiphia	Pararge xiphia (Fabricius, 1775)	Nymphalidae	Satyrinae	Pararge	xiphia	EW5-1	EW5-1	Satyrinae1	DQ176353	DQ176353	TRUE	TRUE				MN752732							DQ176330
Pararge xiphioides	Pararge xiphioides Staudinger, 1871	Nymphalidae	Satyrinae	Pararge	xiphioides	EW28-16	EW28-16	Satyrinae1	DQ176370	DQ176370	TRUE	TRUE											DQ176336
Parnassius apollo	Parnassius apollo (Linnaeus, 1758)	Papilionidae	Parnassiinae	Parnassius	apollo	AC4-1	AC4-1	Papilionidae	EF473775	EF473775	TRUE	FALSE				EF485050							HM213842
Parnassius mnemosyne	Parnassius mnemosyne (Linnaeus, 1758)	Papilionidae	Parnassiinae	Parnassius	mnemosyne	AC1-10	AC1-10	Papilionidae	EF473798	EF473798	TRUE	TRUE				EF485081
Parnassius phoebus	Parnassius phoebus (Fabricius, 1793)	Papilionidae	Parnassiinae	Parnassius	phoebus	NW167-15	NW167-15	Papilionidae	JN204959	JN204959	TRUE	TRUE		JN204950		JN204976			JN204999			JN205043	JN204917
Pelopidas thrax	Pelopidas thrax (Hübner, 1821)	Hesperiidae	Hesperiinae	Pelopidas	thrax	570-ADW	570-ADW	Hesperiinae	EU364492	EU364492	TRUE	TRUE	KX947179	KY045676		EU364287	KY027632		KY027874	KY028142	KY028394	KY028656	EU364084
Phengaris alcon	Phengaris alcon ([Denis & Schiffermüller], 1775)	Lycaenidae	Polyommatinae	Phengaris	alcon	REHU67.1	REHU67.1	Lycaenidae	HQ918153	HQ918153	TRUE	FALSE				HQ918091	KM517332	HQ917973		KM517382			HQ918070
Phengaris arion	Phengaris arion (Linnaeus, 1758)	Lycaenidae	Polyommatinae	Phengaris	arion	SKam1	SKam1	Lycaenidae	HG326638	HG326638	TRUE	FALSE				AY675375	KM517355	GQ128823		KM517406			GQ128928
Phengaris nausithous	Phengaris nausithous (Bergsträsser, 1779)	Lycaenidae	Polyommatinae	Phengaris	nausithous	SR089.01	SR089.01	Lycaenidae	JX311278	JX311278	TRUE	FALSE				AY675356	KM517356	HQ917976		KM517411			KM517474
Phengaris teleius	Phengaris teleius (Bergsträsser, 1779)	Lycaenidae	Polyommatinae	Phengaris	teleius	ZF-LY-000343	ZF-LY-000343	Lycaenidae	JX311290	JX311290	TRUE	FALSE				AY675371	KM517372	HQ917978		KM517437			KM517483
Pieris balcana	Pieris balcana Lorković, 1969	Pieridae	Pierinae	Pieris	balcana	IC02001	IC02001	Pieridae	KC462788		FALSE	#N/A
Pieris brassicae	Pieris brassicae (Linnaeus, 1758)	Pieridae	Pierinae	Pieris	brassicae	NW17724	NW17724	Pieridae	MN752729	MN752729	TRUE	TRUE		MN752806		MN752737	MN752796					MN752761	MN752845
Pieris bryoniae	Pieris bryoniae (Hübner, 1806)	Pieridae	Pierinae	Pieris	bryoniae	RV08M616	RV08M616	Pieridae	HQ004919		FALSE	#N/A
Pieris cheiranthi	Pieris cheiranthi (Hübner, 1808)	Pieridae	Pierinae	Pieris	cheiranthi	MW17001	MW17001	Pieridae	MN829494	MN829494	TRUE	TRUE				MN829471
Pieris ergane	Pieris ergane (Geyer, 1828)	Pieridae	Pierinae	Pieris	ergane	MW06105	MW06105	Pieridae	KC462803	KC462803	FALSE	TRUE
Pieris krueperi	Pieris krueperi Staudinger, 1860	Pieridae	Pierinae	Pieris	krueperi	BPAL1670-12	CCDB-03033 E07	Pieridae	BPAL1670-12		FALSE	#N/A
Pieris mannii	Pieris mannii (Mayer, 1851)	Pieridae	Pierinae	Pieris	mannii	MW06101	MW06101	Pieridae	KC462811	KC462811	TRUE	FALSE				MN829472
Pieris napi	Pieris napi (Linnaeus, 1758)	Pieridae	Pierinae	Pieris	napi	NW17717	NW17717	Pieridae	MN752730	MN752730	TRUE	TRUE		MN752803		MN752734	MN752793		MN752769			MN752758	MN752843
Pieris rapae	Pieris rapae (Linnaeus, 1758)	Pieridae	Pierinae	Pieris	rapae	MM06585	MM06585	Pieridae	JN204969	JN204969	TRUE	TRUE		GQ283572		JN204983	JN204991	JN205026	JN205008	JN205026		JN205036	JN204927
Pieris wollastoni	Pieris wollastoni (Butler, 1886)	Pieridae	Pierinae	Pieris	wollastoni	HA59001	HA59001	Pieridae	KC462820		FALSE	#N/A
Plebejidea loewii	Plebejidea loewii (Zeller, 1847)	Lycaenidae	Polyommatinae	Plebejidea	loewii	AD00P266	AD00P266	Lycaenidae	GQ128989	GQ128989	TRUE	TRUE		GQ128607		GQ128678		GQ128780					GQ128887
Plebejus argus	Plebejus argus (Linnaeus, 1758)	Lycaenidae	Polyommatinae	Plebejus	argus	NK00P135	NK00P135	Lycaenidae	JX093468	JX093468	TRUE	TRUE		GQ128609		AY496828		GQ128782					GQ128889
Plebejus argyrognomon	Plebejus argyrognomon (Bergsträsser, 1779)	Lycaenidae	Polyommatinae	Plebejus	argyrognomon	AD00P560	AD00P560	Lycaenidae	AY496805	AY496805	TRUE	TRUE		GQ128590		AY496827		GQ128763					GQ128870
Plebejus bellieri	Plebejus bellieri (Oberthür, 1910)	Lycaenidae	Polyommatinae	Plebejus	bellieri	WMB1512-13	RV12O113	Lycaenidae	MH419883		FALSE	#N/A
Plebejus idas	Plebejus idas (Linnaeus, 1760)	Lycaenidae	Polyommatinae	Plebejus	idas	NGK02C411	NGK02C411	Lycaenidae	GQ128973	GQ128973	TRUE	TRUE		GQ128591		GQ128662		GQ128764					GQ128871
Polygonia c-album	Polygonia c-album (Linnaeus, 1758)	Nymphalidae	Nymphalinae	Polygonia	c-album	NW70-3	NW70-3	Nymphalinae	AY090222	AY090222	TRUE	TRUE		HQ734879	MN752821	AY090188	FJ639514		HQ735006	HQ735028		FJ639569	AY090154
Polygonia egea	Polygonia egea (Cramer, 1775)	Nymphalidae	Nymphalinae	Polygonia	egea	NW77-15	NW77-15	Nymphalinae	AY248800	AY248800	TRUE	TRUE	MN752828	MN752810		AY248825	FJ639520			MN752746		FJ639575	AY248838
Polyommatus admetus	Polyommatus admetus (Esper, 1783)	Lycaenidae	Polyommatinae	Polyommatus	admetus	AgrAdm	VL03F903	Lycaenidae	EF104617	EF104617	FALSE	TRUE
Polyommatus amandus	Polyommatus amandus (Schneider, 1792)	Lycaenidae	Polyommatinae	Polyommatus	amandus	NK00P596	NK00P596	Lycaenidae	JX093481	JX093481	TRUE	FALSE		JX093247		JX093280		JX093321					JX093431
Polyommatus aroaniensis	Polyommatus aroaniensis (Brown, 1976)	Lycaenidae	Polyommatinae	Polyommatus	aroaniensis	JC00040	JC00040	Lycaenidae	AY556856		FALSE	#N/A
Polyommatus celina	Polyommatus celina (Austaut, 1879)	Lycaenidae	Polyommatinae	Polyommatus	celina	BA09010	BA09010	Lycaenidae	GU559737	GU559737	FALSE	TRUE
Polyommatus damocles	Polyommatus damocles (Herrich-Schäffer, 1844)	Lycaenidae	Polyommatinae	Polyommatus	damocles	NK00P103	NK00P103	Lycaenidae	AY496727	AY496727	TRUE	TRUE		JX093240		AY496839		JX093331					JX093426
Polyommatus damon	Polyommatus damon ([Denis & Schiffermüller], 1775)	Lycaenidae	Polyommatinae	Polyommatus	damon	MAT99Q841	MAT99Q841	Lycaenidae	AY496732	AY496732	TRUE	TRUE		GQ128559		AY496835		GQ128733					GQ128841
Polyommatus damone	Polyommatus damone (Eversmann, 1841)	Lycaenidae	Polyommatinae	Polyommatus	damone	PolDam	VL01B184	Lycaenidae	AY496735	AY496735	FALSE	TRUE
Polyommatus daphnis	Polyommatus daphnis ([Denis & Schiffermüller], 1775)	Lycaenidae	Polyommatinae	Polyommatus	daphnis	PolDap	NK00P108	Lycaenidae	AY496810	AY496810	TRUE	TRUE				AY496845		JX093329					JX093424
Polyommatus dolus	Polyommatus dolus (Hübner, 1823)	Lycaenidae	Polyommatinae	Polyommatus	dolus	Poldol	MAT99Q923	Lycaenidae	AY496740	AY496740	TRUE	TRUE				AY496833
Polyommatus dorylas	Polyommatus dorylas ([Denis & Schiffermüller], 1775)	Lycaenidae	Polyommatinae	Polyommatus	dorylas	GWORA2454-09	BC_ZSM_Lep_30666	Lycaenidae	HQ957210		TRUE	FALSE		JX093248		AY496831		JX093336					JX093420
Polyommatus eros	Polyommatus eros (Ochsenheimer, 1808)	Lycaenidae	Polyommatinae	Polyommatus	eros	ILL011	ILL011	Lycaenidae	EU597132		TRUE	FALSE				JX495367
Polyommatus escheri	Polyommatus escheri (Hübner, 1823)	Lycaenidae	Polyommatinae	Polyommatus	escheri	MAT99Q838	MAT99Q838	Lycaenidae	JX093465	JX093465	TRUE	TRUE		JX093241		JX093296		JX093350					JX093425
Polyommatus fabressei	Polyommatus fabressei (Oberthür, 1910)	Lycaenidae	Polyommatinae	Polyommatus	fabressei	MAT99Q972	MAT99Q972	Lycaenidae	HM210165	HM210165	FALSE	TRUE
Polyommatus fulgens	Polyommatus fulgens (Sagarra, 1925)	Lycaenidae	Polyommatinae	Polyommatus	fulgens	PolFul	MAT99Q910	Lycaenidae	AY496746	AY496746	FALSE	TRUE
Polyommatus golgus	Polyommatus golgus (Hübner, 1813)	Lycaenidae	Polyommatinae	Polyommatus	golgus	MT08032	MT08032	Lycaenidae	GU559744	GU559744	FALSE	TRUE
Polyommatus humedasae	Polyommatus humedasae (Toso & Balletto, 1976)	Lycaenidae	Polyommatinae	Polyommatus	humedasae	RE07G203	RE07G203	Lycaenidae	HM210170	HM210170	FALSE	TRUE
Polyommatus icarus	Polyommatus icarus (Rottemburg, 1775)	Lycaenidae	Polyommatinae	Polyommatus	icarus	NK00P562	NK00P562	Lycaenidae	AY496817	AY496817	TRUE	TRUE		GQ128611		AY496846		GQ128784					GQ128891
Polyommatus iphigenia	Polyommatus iphigenia (Herrich-Schäffer, 1847)	Lycaenidae	Polyommatinae	Polyommatus	iphigenia	Poliph	VL01Q138	Lycaenidae	AY496757	AY496757	FALSE	TRUE
Polyommatus nephohiptamenos	Polyommatus nephohiptamenos (Brown & Coutsis, 1978)	Lycaenidae	Polyommatinae	Polyommatus	nephohiptamenos	JC00045	JC00045	Lycaenidae	AY556859		FALSE	#N/A
Polyommatus nivescens	Polyommatus nivescens (Keferstein, 1851)	Lycaenidae	Polyommatinae	Polyommatus	nivescens	MAT99Q904	MAT99Q904	Lycaenidae	JX093496	JX093496	TRUE	TRUE		JX093249		JX093286		JX093333					JX093421
Polyommatus orphicus	Polyommatus orphicus Kolev, 2005	Lycaenidae	Polyommatinae	Polyommatus	orphicus	ZK06001	ZK06001	Lycaenidae	MN829495	MN829495	FALSE	TRUE
Polyommatus ripartii	Polyommatus ripartii (Freyer, 1830)	Lycaenidae	Polyommatinae	Polyommatus	ripartii	NK00P859	NK00P859	Lycaenidae	AY496779	AY496779	TRUE	TRUE		JX093237		AY496834		JX093362					JX093429
Polyommatus thersites	Polyommatus thersites (Cantener, 1835)	Lycaenidae	Polyommatinae	Polyommatus	thersites	AD00P019	AD00P019	Lycaenidae	JX093455	JX093455	TRUE	TRUE		JX093250		JX093291		JX093320					JX093436
Polyommatus timfristos	Polyommatus timfristos Lukhtanov, Vishnevskaya & Shapoval, 2016	Lycaenidae	Polyommatinae	Polyommatus	timfristos	LR-08-D247	LR-08-D247	Lycaenidae	KY066725		FALSE	#N/A
Polyommatus violetae	Polyommatus violetae (Gómez-Bustillo, Expósito & Martínez, 1979)	Lycaenidae	Polyommatinae	Polyommatus	violetae	RVcoll.08H299	RV08H299	Lycaenidae	HM210175	HM210175	FALSE	TRUE
Pontia callidice	Pontia callidice (Hübner, 1800)	Pieridae	Pierinae	Pontia	callidice	AF-94-A003	2005-LOWA-629	Pieridae	FJ664003	KM046831	TRUE	FALSE		KM046551		AY870548	KM046900		KM046785			KM046660	KM046589
Pontia chloridice	Pontia chloridice (Hübner, 1813)	Pieridae	Pierinae	Pontia	chloridice	PR07002	PR07002	Pieridae	KC462823	KC462823	TRUE	FALSE				JX495369
Pontia daplidice	Pontia daplidice (Linnaeus, 1758)	Pieridae	Pierinae	Pontia	daplidice	BT05001	BT05001	Pieridae	KC462827	KC462827	TRUE	FALSE				MN829473
Pontia edusa	Pontia edusa (Fabricius, 1777)	Pieridae	Pierinae	Pontia	edusa	DG06001	DG06001	Pieridae	KC462854	KC462854	TRUE	FALSE				MN829474
Praephilotes anthracias	Praephilotes anthracias (Christoph, 1877)	Lycaenidae	Polyommatinae	Praephilotes	anthracias	ILL_144	ILL_144	Lycaenidae	KF647243		TRUE	TRUE				KJ698661
Proterebia phegea	Proterebia phegea (Borkhausen, 1788)	Nymphalidae	Satyrinae	Proterebia	phegea	NW143-7	NW143-7	Satyrinae2	GQ357221	GQ357221	TRUE	TRUE				GQ357288	GQ357460					GQ357590	GQ357353
Pseudochazara amalthea	Pseudochazara amalthea (Frivaldszky, 1845)	Nymphalidae	Satyrinae	Pseudochazara	amalthea	LA86	LA86	Satyrinae2	KU499975		FALSE	#N/A
Pseudochazara amymone	Pseudochazara amymone Brown, 1976	Nymphalidae	Satyrinae	Pseudochazara	amymone	LA94	LA94	Satyrinae2	KU499981		FALSE	#N/A
Pseudochazara anthelea	Pseudochazara anthelea (Hübner, 1824)	Nymphalidae	Satyrinae	Pseudochazara	anthelea	BPAL047-10	RPVL-00047	Satyrinae2	HM404669		FALSE	#N/A
Pseudochazara cingovskii	Pseudochazara cingovskii (Gross, 1973)	Nymphalidae	Satyrinae	Pseudochazara	cingovskii	LA24	LA24	Satyrinae2	KU499961		FALSE	#N/A
Pseudochazara euxina	Pseudochazara euxina (Kuznetsov, 1909)	Nymphalidae	Satyrinae	Pseudochazara	euxina	EULEP451-14	KN00813	Satyrinae2	EULEP451-14		FALSE	#N/A
Pseudochazara geyeri	Pseudochazara geyeri (Herrich-Schäffer, 1846)	Nymphalidae	Satyrinae	Pseudochazara	geyeri	LA75	LA75	Satyrinae2	KU499964		FALSE	#N/A
Pseudochazara graeca	Pseudochazara graeca (Staudinger, 1870)	Nymphalidae	Satyrinae	Pseudochazara	graeca	LA77	LA77	Satyrinae2	KU499966		FALSE	#N/A
Pseudochazara mercurius	Pseudochazara mercurius (Staudinger, 1887)	Nymphalidae	Satyrinae	Pseudochazara	mercurius	2005-LOWA-680	2005-LOWA-680	Satyrinae2	FJ664020		TRUE	FALSE				KM200202							KM200297
Pseudochazara orestes	Pseudochazara orestes De Prins & van der Poorten, 1981	Nymphalidae	Satyrinae	Pseudochazara	orestes	LA76	LA76	Satyrinae2	KU499965		FALSE	#N/A
Pseudochazara tisiphone	Pseudochazara tisiphone Brown, [1981]	Nymphalidae	Satyrinae	Pseudochazara	tisiphone	LA80	LA80	Satyrinae2	KU499969		FALSE	#N/A
Pseudochazara williamsi	Pseudochazara williamsi (Romei, 1927)	Nymphalidae	Satyrinae	Pseudochazara	williamsi	RVcoll.08-L140	RV08L140	Satyrinae2	GU676410		FALSE	#N/A
Pseudophilotes abencerragus	Pseudophilotes abencerragus (Pierret, 1837)	Lycaenidae	Polyommatinae	Pseudophilotes	abencerragus	RV08H435	RV08H435	Lycaenidae	JF262049	JF262049	TRUE	TRUE				JF271998		HQ917989					HQ918019
Pseudophilotes barbagiae	Pseudophilotes barbagiae De Prins & van der Poorten, 1982	Lycaenidae	Polyommatinae	Pseudophilotes	barbagiae	WMB1158-13	RV11E512	Lycaenidae	MH235167		FALSE	#N/A
Pseudophilotes baton	Pseudophilotes baton (Bergsträsser, 1779)	Lycaenidae	Polyommatinae	Pseudophilotes	baton	MAT99Q857	MAT99Q829	Lycaenidae	AY675416	AY675416	TRUE	FALSE				AY675369		HQ917986					HQ918016
Pseudophilotes bavius	Pseudophilotes bavius (Eversmann, 1832)	Lycaenidae	Polyommatinae	Pseudophilotes	bavius	AD00P155	AD00P155	Lycaenidae	AY675405	AY675405	TRUE	TRUE				AY675358		HQ917987					HQ918017
Pseudophilotes panoptes	Pseudophilotes panoptes (Hübner, 1813)	Lycaenidae	Polyommatinae	Pseudophilotes	panoptes	RV06H852	RV06H852	Lycaenidae	JF262060	JF262060	TRUE	TRUE				JF271997		HQ917990					HQ918020
Pseudophilotes vicrama	Pseudophilotes vicrama (Moore, 1865)	Lycaenidae	Polyommatinae	Pseudophilotes	vicrama	NK00P753	NK00P753	Lycaenidae	AY675421	AY675421	TRUE	TRUE				AY675374		HQ917988					HQ918018
Pyrgus alveus	Pyrgus alveus (Hübner, 1803)	Hesperiidae	Pyrginae	Pyrgus	alveus	RV08M586	RV08M586	Pyrginae	HQ005094		FALSE	#N/A
Pyrgus andromedae	Pyrgus andromedae (Wallengren, 1853)	Hesperiidae	Pyrginae	Pyrgus	andromedae	PHLAC706-10	TLMF_Lep_02741	Pyrginae	JF860261		FALSE	#N/A
Pyrgus armoricanus	Pyrgus armoricanus (Oberthür, 1910)	Hesperiidae	Pyrginae	Pyrgus	armoricanus	RV07D534	RV07D534	Pyrginae	HQ005104		FALSE	#N/A
Pyrgus cacaliae	Pyrgus cacaliae (Rambur, 1839)	Hesperiidae	Pyrginae	Pyrgus	cacaliae	RVcoll.08-M576	RV08M576	Pyrginae	HQ005124		FALSE	#N/A
Pyrgus carlinae	Pyrgus carlinae (Rambur, 1839)	Hesperiidae	Pyrginae	Pyrgus	carlinae	WMB1594-13	WMB1594-13	Pyrginae	MN145233		FALSE	#N/A
Pyrgus carthami	Pyrgus carthami (Hübner, 1813)	Hesperiidae	Pyrginae	Pyrgus	carthami	RE07G218	RE07G218	Pyrginae	PRJNA432311	PRJNA432311	TRUE	TRUE		PRJNA432311		PRJNA432311	PRJNA432311		PRJNA432311	PRJNA432311	PRJNA432311	PRJNA432311	PRJNA432311
Pyrgus centaureae	Pyrgus centaureae (Rambur, 1839)	Hesperiidae	Pyrginae	Pyrgus	centaureae	NHMO-06035	NHMO-06035	Pyrginae	KX050114		FALSE	#N/A
Pyrgus cinarae	Pyrgus cinarae (Rambur, 1839)	Hesperiidae	Pyrginae	Pyrgus	cinarae	RV08P504	RV08P504	Pyrginae	JF283337		FALSE	#N/A
Pyrgus cirsii	Pyrgus cirsii (Rambur, 1839)	Hesperiidae	Pyrginae	Pyrgus	cirsii	RV06J002	RV06J002	Pyrginae	GU676777		FALSE	#N/A
Pyrgus foulquieri	Pyrgus foulquieri (Oberthür, 1910)	Hesperiidae	Pyrginae	Pyrgus	foulquieri	RVcoll.07-W205	RV07W205	Pyrginae	KP871172		FALSE	#N/A
Pyrgus malvae	Pyrgus malvae (Linnaeus, 1758)	Hesperiidae	Pyrginae	Pyrgus	malvae	MM00034	MM00034	Pyrginae	GU828583	GU828382	TRUE	TRUE		GU828085		GU828922	GU829744		GU829972	GU830296		GU830600	GU829483
Pyrgus malvoides	Pyrgus malvoides (Elwes & Edwards, 1897)	Hesperiidae	Pyrginae	Pyrgus	malvoides	RV06J009	RV06J009	Pyrginae	GU676779		FALSE	#N/A
Pyrgus onopordi	Pyrgus onopordi (Rambur, 1839)	Hesperiidae	Pyrginae	Pyrgus	onopordi	RV06A043	RV06A043	Pyrginae	GU676830		FALSE	#N/A
Pyrgus serratulae	Pyrgus serratulae (Rambur, 1839)	Hesperiidae	Pyrginae	Pyrgus	serratulae	RV06A260	RV06A260	Pyrginae	GU676821		FALSE	#N/A
Pyrgus sidae	Pyrgus sidae (Esper, 1784)	Hesperiidae	Pyrginae	Pyrgus	sidae	RV08R494	RV08R494	Pyrginae	JF283380		FALSE	#N/A
Pyrgus warrenensis	Pyrgus warrenensis (Verity, 1928)	Hesperiidae	Pyrginae	Pyrgus	warrenensis	GWORL193-09	BC_ZSM_Lep_18599	Pyrginae	GU687045		FALSE	#N/A
Pyronia bathseba	Pyronia bathseba (Fabricius, 1793)	Nymphalidae	Satyrinae	Pyronia	bathseba	RV-03-H546	RV03H546	Satyrinae2	DQ338841	DQ338841	TRUE	TRUE				DQ338991							DQ338704
Pyronia cecilia	Pyronia cecilia (Vallantin, 1894)	Nymphalidae	Satyrinae	Pyronia	cecilia	EW4-2	EW4-2	Satyrinae2	KR138754	KR138754	TRUE	TRUE				DQ338992	GQ357461					GQ357591	DQ338705
Pyronia tithonus	Pyronia tithonus (Linnaeus, 1771)	Nymphalidae	Satyrinae	Pyronia	tithonus	NW177-13	NW177-13	Satyrinae2	MN752731	MN752731	FALSE	TRUE
Satyrium acaciae	Satyrium acaciae (Fabricius, 1787)	Lycaenidae	Theclinae	Satyrium	acaciae	RV08M378	RV08M378	Lycaenidae	HQ005162		TRUE	FALSE				KM211589
Satyrium esculi	Satyrium esculi (Hübner, 1804)	Lycaenidae	Theclinae	Satyrium	esculi	MW01027	MW01027	Lycaenidae	AY556950		FALSE	#N/A
Satyrium ilicis	Satyrium ilicis (Esper, 1779)	Lycaenidae	Theclinae	Satyrium	ilicis	RV06M907	RV06M907	Lycaenidae	HQ005168		FALSE	#N/A
Satyrium ledereri	Satyrium ledereri (Boisduval, 1848)	Lycaenidae	Theclinae	Satyrium	ledereri	EULEP5112-17	RVcoll16J867	Lycaenidae	EULEP5112-17		FALSE	#N/A
Satyrium pruni	Satyrium pruni (Linnaeus, 1758)	Lycaenidae	Theclinae	Satyrium	pruni	SatPru	SatPru	Lycaenidae	GU372540	GU372540	TRUE	TRUE				GU372631
Satyrium spini	Satyrium spini ([Denis & Schiffermüller], 1775)	Lycaenidae	Theclinae	Satyrium	spini	RV07E671	RV07E671	Lycaenidae	HQ005186		TRUE	FALSE				KM211587
Satyrium w-album	Satyrium w-album (Knoch, 1782)	Lycaenidae	Theclinae	Satyrium	w-album	MM18672	MM18672	Lycaenidae	KT782725		TRUE	FALSE				GU372659
Satyrus actaea	Satyrus actaea (Esper, 1781)	Nymphalidae	Satyrinae	Satyrus	actaea	NW162-21	NW162-21	Satyrinae2	GQ864807	GQ864807	TRUE	TRUE		GQ864709		GQ864901	GQ865030		GQ865146	GQ865262		GQ865494	GQ864495
Satyrus ferula	Satyrus ferula (Fabricius, 1793)	Nymphalidae	Satyrinae	Satyrus	ferula	EW26-21	EW26-21	Satyrinae2	DQ338872	DQ338872	TRUE	TRUE				DQ339030							DQ338739
Satyrus virbius	Satyrus virbius Herrich-Schäffer, 1844	Nymphalidae	Satyrinae	Satyrus	virbius	EULEP3136-15	RVcoll.14-O269	Satyrinae2	EULEP3136-15		FALSE	#N/A
Scolitantides orion	Scolitantides orion (Pallas, 1771)	Lycaenidae	Polyommatinae	Scolitantides	orion	VL02L518	VL02L518	Lycaenidae	AY675441	AY675441	TRUE	TRUE				AY675394							HQ918021
Speyeria aglaja	Speyeria aglaja (Linnaeus, 1758)	Nymphalidae	Heliconiinae	Speyeria	aglaja	NW76-15	NW76-15	Heliconiinae_Limenitidinae	DQ922860	DQ922860	TRUE	TRUE				DQ922892	KY773399				MN752814	KY773504	DQ922828
Spialia orbifer	Spialia orbifer (Hübner, 1823)	Hesperiidae	Pyrginae	Spialia	orbifer	RV07D138	RV07D138	Pyrginae	HQ005210		TRUE	FALSE											KU905665
Spialia phlomidis	Spialia phlomidis (Herrich-Schäffer, 1845)	Hesperiidae	Pyrginae	Spialia	phlomidis	RV07C520	RV07C520	Pyrginae	KU905402		FALSE	#N/A
Spialia rosae	Spialia rosae Hernández-Roldán, Dapporto, Dincă, Vicente & Vila, 2016	Hesperiidae	Pyrginae	Spialia	rosae	RV10A098	RV10A098	Pyrginae	KU905577		TRUE	FALSE											KU905703
Spialia sertorius	Spialia sertorius (Hoffmansegg, 1804)	Hesperiidae	Pyrginae	Spialia	sertorius	390-ADW	390ADW	Pyrginae	KY019900	EU364381	TRUE	TRUE	KX947221	KY045722		EU364176	KY027678		KY027920	KY028191	KY028438	KY028701	EU363983
Spialia therapne	Spialia therapne (Rambur, 1832)	Hesperiidae	Pyrginae	Spialia	therapne	RV09T179	RV09T179	Pyrginae	KU905582		TRUE	FALSE											KU905688
Tarucus balkanicus	Tarucus balkanicus (Freyer, 1844)	Lycaenidae	Polyommatinae	Tarucus	balkanicus	NIBGE-BUT-00240	NIBGE-BUT-00240	Lycaenidae	KC158463		TRUE	FALSE				KJ671874
Tarucus theophrastus	Tarucus theophrastus (Fabricius, 1793)	Lycaenidae	Polyommatinae	Tarucus	theophrastus	MW02025	MW02025	Lycaenidae	AY556974		FALSE	#N/A
Thecla betulae	Thecla betulae (Linnaeus, 1758)	Lycaenidae	Theclinae	Thecla	betulae	TheBet	TheBet	Lycaenidae	GU372599	GU372599	TRUE	TRUE				GU372690
Thymelicus acteon	Thymelicus acteon (Rottemburg, 1775)	Hesperiidae	Hesperiinae	Thymelicus	acteon	RV08M549	RV08M549	Hesperiinae	HQ005219		FALSE	#N/A
Thymelicus christi	Thymelicus christi Rebel, 1894	Hesperiidae	Hesperiinae	Thymelicus	christi	XM14004	XM14004	Hesperiinae	MN829496	MN829496	FALSE	TRUE
Thymelicus hyrax	Thymelicus hyrax (Lederer, 1861)	Hesperiidae	Hesperiinae	Thymelicus	hyrax	IRANB192-08	VNLEP00004	Hesperiinae	IRANB192-08		FALSE	#N/A
Thymelicus lineola	Thymelicus lineola (Ochsenheimer, 1808)	Hesperiidae	Hesperiinae	Thymelicus	lineola	MM03333	MM03333	Hesperiinae	JN204962	JN204962	TRUE	TRUE		JN204935		JN204978	JN204987		JN205002	JN205020		JN205029	JN204920
Thymelicus sylvestris	Thymelicus sylvestris (Poda, 1761)	Hesperiidae	Hesperiinae	Thymelicus	sylvestris	RE04C201	RE04C201	Hesperiinae	PRJNA432311	PRJNA432311	TRUE	TRUE		PRJNA432311		PRJNA432311	PRJNA432311		PRJNA432311	PRJNA432311	PRJNA432311	PRJNA432311	PRJNA432311
Tomares ballus	Tomares ballus (Fabricius, 1787)	Lycaenidae	Theclinae	Tomares	ballus	RV00Q028	RV00Q028	Lycaenidae	KT286572	KT286572	TRUE	TRUE		KT286378		KT286264		KT286703					KT286081
Tomares callimachus	Tomares callimachus (Eversmann, 1848)	Lycaenidae	Theclinae	Tomares	callimachus	ILL_153	ILL_153	Lycaenidae	KF647240		FALSE	#N/A
Tomares nogelii	Tomares nogelii (Herrich-Schäffer, 1851)	Lycaenidae	Theclinae	Tomares	nogelii	TOMAR093-09	DNAwth_Tomares_093	Lycaenidae	HM385171		FALSE	#N/A
Tongeia fischeri	Tongeia fischeri (Eversmann, 1843)	Lycaenidae	Polyommatinae	Tongeia	fischeri	NK00P594	NK00P594	Lycaenidae	GQ129010	GQ129010	TRUE	TRUE		GQ128629		GQ128698		GQ128802					GQ128909
Turanana taygetica	Turanana taygetica (Rebel, 1902)	Lycaenidae	Polyommatinae	Turanana	taygetica	ZF-LY-000088	RVcoll.14-G084	Lycaenidae	EULEP1414-15		TRUE	FALSE				JF271999		HQ917994					HQ918024
Vanessa atalanta	Vanessa atalanta (Linnaeus, 1758)	Nymphalidae	Nymphalinae	Vanessa	atalanta	NW63-21	NW63-21	Nymphalinae	AY090221	AY090221	TRUE	TRUE	GQ864589	GQ864722	MN752819	AY090187	GQ865045		GQ865155	GQ865275		GQ865508	AF412772
Vanessa cardui	Vanessa cardui (Linnaeus, 1758)	Nymphalidae	Nymphalinae	Vanessa	cardui	NW74-7	NW74-7	Nymphalinae	HQ734908	HQ734908	TRUE	TRUE	HQ734851	HQ734873	MN752822	HQ734947	HQ734971		HQ734993	HQ735015		HQ735047	HQ734838
Vanessa virginiensis	Vanessa virginiensis (Drury, 1773)	Nymphalidae	Nymphalinae	Vanessa	virginiensis	NW77-16	NW77-16	Nymphalinae	AY248783	AY248783	TRUE	TRUE	HQ734853		KM013309	AY248808	HQ734973		HQ734995			HQ735049	AY248827
Vanessa vulcania	Vanessa vulcania Godart, 1819	Nymphalidae	Nymphalinae	Vanessa	vulcania	NW77-13	NW77-13	Nymphalinae	HQ734911	HQ734911	TRUE	FALSE	HQ734852	HQ734874	MN752823	MN829475	HQ734972		HQ734994	HQ735016		HQ735048	HQ734839
Ypthima asterope	Ypthima asterope (Klug, 1832)	Nymphalidae	Satyrinae	Ypthima	asterope	F18	F18	Satyrinae2	GU012510		TRUE	FALSE				AY509110								EF-1a substituted by Y. doleta
Zegris eupheme	Zegris eupheme (Esper, 1804)	Pieridae	Pierinae	Zegris	eupheme	RV-08-H240	2005-LOWA-842	Pieridae	FJ664085		TRUE	FALSE		KM046561		AY870559	KM046910		KM046795	KM046730		KM046667	KM046596
Zegris pyrothoe	Zegris pyrothoe (Eversmann, 1832)	Pieridae	Pierinae	Zegris	pyrothoe	2005-LOWA-799	2005-LOWA-799	Pieridae	FJ664093		FALSE	#N/A
Zerynthia cassandra	Zerynthia cassandra (Geyer, [1828])	Papilionidae	Parnassiinae	Zerynthia	cassandra	ZerCas	isolate_1043	Papilionidae	KC119707	DQ875939	TRUE	FALSE											KC119743
Zerynthia caucasica	Zerynthia caucasica (Lederer, 1864)	Papilionidae	Parnassiinae	Zerynthia	caucasica	FS-2046	FS-2046	Papilionidae	DQ351042		TRUE	TRUE				DQ351122							DQ351149
Zerynthia cerisy	Zerynthia cerisy (Godart, 1824)	Papilionidae	Parnassiinae	Zerynthia	cerisy	FS-a-342	FS-a-342	Papilionidae	AF170869	AF170869	TRUE	TRUE				AF173409							DQ351146
Zerynthia cretica	Zerynthia cretica (Rebel, 1904)	Papilionidae	Parnassiinae	Zerynthia	cretica	FS-b-2038	FS-b-2038	Papilionidae	DQ351041		TRUE	TRUE				DQ351121							DQ351148
Zerynthia polyxena	Zerynthia polyxena ([Denis & Schiffermüller], 1775)	Papilionidae	Parnassiinae	Zerynthia	polyxena	FS-b-1596	FS-b-1596	Papilionidae	DQ351039	DQ351039	TRUE	TRUE				DQ351119							DQ351145
Zerynthia rumina	Zerynthia rumina (Linnaeus, 1758)	Papilionidae	Parnassiinae	Zerynthia	rumina	FS-a-88	FS-a-88	Papilionidae	AF170870	AF170870	TRUE	TRUE				AF173410							DQ351144
Zizeeria karsandra	Zizeeria karsandra (Moore, 1865)	Lycaenidae	Polyommatinae	Zizeeria	karsandra	KD94Q064	KD94Q064	Lycaenidae	GQ129036	GQ129036	TRUE	TRUE				GQ128727		GQ128836					GQ128940
Zizeeria knysna	Zizeeria knysna (Trimen, 1862)	Lycaenidae	Polyommatinae	Zizeeria	knysna	ILL_180	ILL_180	Lycaenidae	KJ131019		TRUE	TRUE				KJ671876
